# Supplementary material for: International epidemiology databases to evaluate AIDS (IeDEA) in sub-Saharan Africa, 2012–2019
Source: PubMed Central journal article supplement (PMC7232622; doi:10.1136/bmjopen-2019-035246), 2020-05-15
Supplement: bmjopen-2019-035246.draft_revisions.pdf [file bmjopen-2019-035246.draft_revisions.pdf]

# BMJ Open

BMJ Open is committed to open peer review. As part of this commitment we make the peer review history of every article we publish publicly available.

When an article is published we post the peer reviewers' comments and the authors' responses online. We also post the versions of the paper that were used during peer review. These are the versions that the peer review comments apply to.

The versions of the paper that follow are the versions that were submitted during the peer review process. They are not the versions of record or the final published versions. They should not be cited or distributed as the published version of this manuscript.

BMJ Open is an open access journal and the full, final, typeset and author-corrected version of record of the manuscript is available on our site with no access controls, subscription charges or pay-per-view fees (<http://bmjopen.bmj.com>).

If you have any questions on BMJ Open's open peer review process please email [info.bmjopen@bmj.com](mailto:info.bmjopen@bmj.com)

# BMJ Open

## Cohort profile: The International epidemiology Databases to Evaluate AIDS (IeDEA) in sub-Saharan Africa, 2012-2019

|                               |                                                                                                                                                                                                                                                                                                                                                                                                                                                                                                                                                                                                                                                                                                                                                                                                                                                                                                                                                                                                                                                                                                                                                                                                                                                                                                                                                                                                                                                                                                                                                                                                                                                                                                                                                              |
|-------------------------------|--------------------------------------------------------------------------------------------------------------------------------------------------------------------------------------------------------------------------------------------------------------------------------------------------------------------------------------------------------------------------------------------------------------------------------------------------------------------------------------------------------------------------------------------------------------------------------------------------------------------------------------------------------------------------------------------------------------------------------------------------------------------------------------------------------------------------------------------------------------------------------------------------------------------------------------------------------------------------------------------------------------------------------------------------------------------------------------------------------------------------------------------------------------------------------------------------------------------------------------------------------------------------------------------------------------------------------------------------------------------------------------------------------------------------------------------------------------------------------------------------------------------------------------------------------------------------------------------------------------------------------------------------------------------------------------------------------------------------------------------------------------|
| Journal:                      | <i>BMJ Open</i>                                                                                                                                                                                                                                                                                                                                                                                                                                                                                                                                                                                                                                                                                                                                                                                                                                                                                                                                                                                                                                                                                                                                                                                                                                                                                                                                                                                                                                                                                                                                                                                                                                                                                                                                              |
| Manuscript ID                 | bmjopen-2019-035246                                                                                                                                                                                                                                                                                                                                                                                                                                                                                                                                                                                                                                                                                                                                                                                                                                                                                                                                                                                                                                                                                                                                                                                                                                                                                                                                                                                                                                                                                                                                                                                                                                                                                                                                          |
| Article Type:                 | Cohort profile                                                                                                                                                                                                                                                                                                                                                                                                                                                                                                                                                                                                                                                                                                                                                                                                                                                                                                                                                                                                                                                                                                                                                                                                                                                                                                                                                                                                                                                                                                                                                                                                                                                                                                                                               |
| Date Submitted by the Author: | 24-Oct-2019                                                                                                                                                                                                                                                                                                                                                                                                                                                                                                                                                                                                                                                                                                                                                                                                                                                                                                                                                                                                                                                                                                                                                                                                                                                                                                                                                                                                                                                                                                                                                                                                                                                                                                                                                  |
| Complete List of Authors:     | <p>Chammartin, Frédérique; University of Bern, Institute of Social &amp; Preventive Medicine<br/>         Dao Ostinelli, Cam Ha; University of Bern, Institute of Social &amp; Preventive Medicine<br/>         Anastos, Kathryn; Albert Einstein College of Medicine, Department of Medicine<br/>         Jaquet, Antoine; University of Bordeaux, ISPED, Centre INSERM U1219 – Bordeaux Population Health<br/>         Brazier, Ellen ; City University of New York, Institute for Implementation Science in Population Health; City University of New York, Graduate School of Public Health and Health Policy<br/>         Brown, Steven; Indiana University Richard M Fairbanks School of Public Health, Department of Biostatistics<br/>         DABIS, FRANCOIS; University of Bordeaux, ISPED, Centre INSERM U1219 – Bordeaux Population Health<br/>         Davies, Mary-Ann; University of Cape Town, Centre for Infectious Disease Epidemiology and Research, School of Public Health and Family Medicine<br/>         Duda, Stephany N; Vanderbilt University School of Medicine, Department of Biomedical Informatics<br/>         Malateste, Karen; University of Bordeaux, ISPED, Centre INSERM U1219 – Bordeaux Population Health<br/>         Nash, Denis; City University of New York, Institute for Implementation Science in Population Health; City University of New York, Graduate School of Public Health and Health Policy<br/>         Wools-Kaloustian, Kara; Indiana University School of Medicine, Department of Medicine<br/>         von Groote, Per M; University of Bern, Institute of Social &amp; Preventive Medicine<br/>         Egger, Matthias; University of Bern, Institute of Social &amp; Preventive Medicine</p> |
| Keywords:                     | HIV & AIDS < INFECTIOUS DISEASES, EPIDEMIOLOGY, INFECTIOUS DISEASES, Tuberculosis < INFECTIOUS DISEASES                                                                                                                                                                                                                                                                                                                                                                                                                                                                                                                                                                                                                                                                                                                                                                                                                                                                                                                                                                                                                                                                                                                                                                                                                                                                                                                                                                                                                                                                                                                                                                                                                                                      |
|                               |                                                                                                                                                                                                                                                                                                                                                                                                                                                                                                                                                                                                                                                                                                                                                                                                                                                                                                                                                                                                                                                                                                                                                                                                                                                                                                                                                                                                                                                                                                                                                                                                                                                                                                                                                              |

1  
2  
3  
4  
5  
6  
7  
8  
9  
10  
11  
12  
13  
14  
15  
16  
17  
18  
19  
20  
21  
22  
23  
24  
25  
26  
27  
28  
29  
30  
31  
32  
33  
34  
35  
36  
37  
38  
39  
40  
41  
42  
43  
44  
45  
46  
47  
48  
49  
50  
51  
52  
53  
54  
55  
56  
57  
58  
59  
60

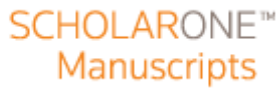

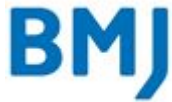

I, the Submitting Author has the right to grant and does grant on behalf of all authors of the Work (as defined in the below author licence), an exclusive licence and/or a non-exclusive licence for contributions from authors who are: i) UK Crown employees; ii) where BMJ has agreed a CC-BY licence shall apply, and/or iii) in accordance with the terms applicable for US Federal Government officers or employees acting as part of their official duties; on a worldwide, perpetual, irrevocable, royalty-free basis to BMJ Publishing Group Ltd ("BMJ") its licensees and where the relevant Journal is co-owned by BMJ to the co-owners of the Journal, to publish the Work in this journal and any other BMJ products and to exploit all rights, as set out in our [licence](#).

The Submitting Author accepts and understands that any supply made under these terms is made by BMJ to the Submitting Author unless you are acting as an employee on behalf of your employer or a postgraduate student of an affiliated institution which is paying any applicable article publishing charge ("APC") for Open Access articles. Where the Submitting Author wishes to make the Work available on an Open Access basis (and intends to pay the relevant APC), the terms of reuse of such Open Access shall be governed by a Creative Commons licence – details of these licences and which [Creative Commons](#) licence will apply to this Work are set out in our licence referred to above.

Other than as permitted in any relevant BMJ Author's Self Archiving Policies, I confirm this Work has not been accepted for publication elsewhere, is not being considered for publication elsewhere and does not duplicate material already published. I confirm all authors consent to publication of this Work and authorise the granting of this licence.

Version 4. Target journal: BMJ Open

# Cohort profile: The International epidemiology Databases to Evaluate AIDS (IeDEA) in sub-Saharan Africa, 2012-2019

Frédérique Chammartin<sup>1</sup>, Cam Ha Dao Ostinelli<sup>1</sup>, Kathryn Anastos<sup>2</sup>, Antoine Jaquet,<sup>3</sup> Ellen Brazier<sup>4,5</sup>, Steven Brown<sup>6</sup>, François Dabis<sup>3</sup>, Mary-Ann Davies<sup>7</sup>, Stephany N Duda<sup>8</sup>, Karen Malateste<sup>3</sup>, Denis Nash<sup>4,5</sup>, Kara K Wools-Kaloustian<sup>9</sup>, Per M von Groote<sup>1</sup>, Matthias Egger<sup>1,7</sup>

<sup>1</sup> Institute of Social and Preventive Medicine, University of Bern, Bern, Switzerland

<sup>2</sup> Department of Medicine, Albert Einstein College of Medicine, Bronx, NY, USA

<sup>3</sup> Université Bordeaux, ISPED, Centre INSERM U1219 – Bordeaux Population Health, Bordeaux, France

<sup>4</sup> Institute for Implementation Science in Population Health, City University of New York, NY, USA

<sup>5</sup> Graduate School of Public Health and Health Policy, City University of New York, NY, USA

<sup>6</sup> Department of Biostatistics, Indiana University Fairbanks School of Public Health, Indianapolis, IN, United States

<sup>7</sup> Centre for Infectious Disease Epidemiology and Research, School of Public Health and Family Medicine, University of Cape Town, South Africa

<sup>8</sup> Department of Biomedical Informatics, Vanderbilt School of Medicine, Nashville, TN, USA

<sup>9</sup> Department of Medicine, Indiana University School of Medicine, Indianapolis, IN, United States

## Correspondence to:

Professor Matthias Egger  
Institute of Social and Preventive Medicine (ISPM)  
University of Bern  
Mittelstrasse 43  
CH-3012 Bern  
Switzerland  
matthias.egger@ispm.unibe.ch

Abstract 293 words, main text 2426 words, 2 tables, 3 figures, 1 Box with strengths and weaknesses (227 words), footnotes (375 words), 69 references

## ABSTRACT

**Purpose:** The objectives of the International epidemiology Databases to Evaluate AIDS (leDEA) are to (i) evaluate the delivery of combination antiretroviral therapy (ART) in children, adolescents and adults in sub-Saharan Africa, (ii) to describe ART regimen effectiveness, durability and tolerability, (iii) to examine HIV-related comorbidities and co-infections, and (iv) to examine the pregnancy- and HIV-related outcomes of women on ART and their infants exposed to HIV or antiretroviral therapy in utero or via breastmilk.

**Participants:** leDEA is organized in four regions (Central, East, Southern and West Africa), with 240 treatment and care sites, six data centres at African, European and US universities, and almost 1.4 million children, adolescents and adult people living with HIV (PLWHIV) enrolled.

**Findings to date:** The data include socio-demographic characteristics, clinical outcomes, opportunistic events, treatment regimens, clinic visits and laboratory measurements. They have been used to analyse outcomes in people living with HIV-1 or HIV-2 who initiate ART, including determinants of mortality, of switching to second-line and third-line ART, drug resistance, loss to follow-up and the immunological and virological response to different ART regimens. Programme-level estimates of mortality have been corrected for loss to follow-up. We examined the impact of co-infection with hepatitis B and C, and the epidemiology of different cancers and of (multi-drug resistant) tuberculosis, renal disease and of mental illness. The adoption of “Treat All”, making ART available to all PLWHIV regardless of CD4<sup>+</sup> cell count or clinical stage was another important research topic.

**Future plans:** leDEA has formulated several research priorities for the “Treat All” era in sub-Saharan Africa. It recently obtained funding to set up sentinel sites where additional data are prospectively collected on cardiometabolic risks factors as well as mental health and liver diseases, and is planning to create a drug resistance database.

## INTRODUCTION

The introduction of combination antiretroviral therapy (ART) in sub-Saharan Africa from 2004 onwards has substantially improved the prognosis of HIV-1 infection, with a decline in AIDS-related deaths [1] and a decline in the incidence of new HIV-1 infections [2]. However, in many settings HIV/AIDS is still a public health threat. An estimated 1.8 million new infections occurred in 2017 and almost a million adult and child deaths were due to HIV, most of them in sub-Saharan Africa [2].

The World Health Organization (WHO), the Joint United Nations Programme on HIV/AIDS (UNAIDS) and many of the countries most heavily affected by the HIV epidemic have committed to ending HIV/AIDS as a major public health problem by 2030.[1] Targets to be reached by 2020 include that 90% of people living with HIV (PLWHIV) be aware of their status, 90% of those diagnosed initiate ART, and 90% of those on ART achieve undetectable viral loads (the 90-90-90 targets) [3]. Progress towards these goals has been substantial, especially in the most affected regions of Eastern and Southern Africa. The latest estimates suggested that the two regions are on track and had achieved 76%, 79% and 83% of the 90-90-90 targets, respectively in 2017 [4]. West and Central Africa face difficulties with the first 90% target and only an estimated 42% of PLWHIV in these regions were aware of their status [4].

Established more than ten years ago by the National Institutes of Health (NIH), the International epidemiology Databases to Evaluate AIDS (IeDEA) are a global cohort collaboration that collects HIV/AIDS data from HIV care and treatment programs, including in sub-Saharan Africa. The regional IeDEA data centres consolidate, curate and analyse data to evaluate the outcomes of people living with HIV/AIDS and monitor progress. The first years of the cohorts in sub-Saharan Africa were described previously [5]; here we provide an update on methods, key data and future plans.

## COHORT DESCRIPTION

In 2006 the National Institute of Allergy and Infectious Diseases (NIAID) sought applications for a global consortium structured through regional centres to pool clinical and epidemiological data on PLWHIV, in order to address questions that could not be answered by individual cohorts [5]. IeDEA covers seven geographic regions, namely

1  
2  
3 North America, the Caribbean and Central/South America, the Asia-Pacific and four  
4 regions in sub-Saharan Africa: West Africa, Central Africa, East Africa and Southern  
5 Africa. The project was initially funded for a 5-year period and has since been extended  
6 twice, with the current funding cycle ending in 2021.  
7  
8  
9

### 10 ***Settings and number of PLWHIV enrolled***

11  
12  
13 To date, the African regions of IeDEA received data from 240 HIV care and treatment  
14 facilities in 19 sub-Saharan African countries ([Figure 1A](#)). Close to 1,400,000 PLWHIV  
15 who initiated ART in sub-Saharan Africa are included ([Figure 1B](#)), of whom over 680,000  
16 are currently in care. In East and Southern Africa, both urban and rural facilities are well  
17 represented, while in Central and West Africa, urban facilities dominate. Facilities are  
18 predominately public (95%) and operated at the primary or secondary care level, with  
19 the exception of West Africa where 70% of facilities are at the tertiary level of care ([Table](#)  
20 [1](#)).  
21  
22  
23  
24  
25  
26

### 27 ***Data collection at individual and site level***

28  
29  
30 Since its inception, IeDEA has collected routine clinical data of PLWHIV followed under  
31 treatment, which includes socio-demographic characteristics, clinical outcomes,  
32 opportunistic events, treatment regimens, clinic visits and laboratory measurements. More  
33 recently, the IeDEA network has developed a Data Exchange Standard (DES) protocol  
34 (see [www.iedeades.org](http://www.iedeades.org)) with 25 data tables, which include a total of 228 unique variables  
35 (36 compulsory and 192 additional variables) and within-region unique patient research  
36 identifiers. Standardized data collection is supported by eight codebooks, including the  
37 Anatomical Therapeutic Chemical (ATC) classification for drugs and lists with codes for  
38 reasons for stopping treatment, for dropping out of the cohort, for mode of HIV infection,  
39 country, type and site of comorbidities, laboratory measurements and units of  
40 measurements and type of viral load assay. The collection, management and sharing of  
41 data is facilitated by the Harmonist toolkit, a software and standards package that supports  
42 research projects through the Research Electronic Data Capture (REDCap) system [6].  
43  
44  
45  
46  
47  
48  
49  
50  
51  
52

53 In recent years, site assessments and site surveys have been conducted on a regular  
54 basis to collect up-to-date information related to available clinical service and care models  
55 in the participating facilities. For example, a study compared the characteristics and  
56  
57  
58  
59  
60



1  
2  
3 comprehensiveness of adult HIV care and treatment programmes in sub-Saharan Africa  
4 with programmes in the Americas and Asia-Pacific region [7]. Other studies examined the  
5 management of mental health and substance use disorders [8], or the diagnostic and  
6 screening practices for (drug resistant) tuberculosis in adult and paediatric patients [9–  
7 11]. Furthermore, the routine data collected by participating sites have been enriched in  
8 some countries by linking the routine HIV databases to cancer registries [12,13], vital  
9 registries [14] or administrative databases [15].

### 16 ***Trends in CD4 cell count and viral load measurements***

17  
18 While WHO continues to recommend a CD4 cell count before starting ART to inform the  
19 management of advanced disease and differentiated care in the Treat All era, it also  
20 recommends that CD4 testing be replaced by viral load measurement for monitoring of  
21 treatment and identification of treatment failure [16]. Figure 2 shows that in Southern and  
22 West Africa, the number of CD4 measurements tended to be stable over time, despite an  
23 increasing number of PLWHIV in care, while in East and Central Africa the number of CD4  
24 measurements dropped. At present, 53% of the active facilities reported routine CD4  
25 testing and 65% routine viral load testing (Table 1). The United States President's  
26 Emergency Plan for AIDS Relief (PEPFAR), which provides substantial funding for AIDS  
27 treatment, care and prevention in countries most affected by the epidemic, has  
28 progressively reduced its support for CD4 testing [17].

### 38 ***Trends in antiretroviral therapy***

39  
40 Until recently, the recommended first-line ART regimen in sub-Saharan Africa consisted  
41 of two nucleoside reverse transcriptase inhibitors and one non-nucleoside reverse  
42 transcriptase inhibitor (2NRTIs+1NNRTI). The combination of tenofovir (TDF), lamivudine  
43 (3TC) (or emtricitabine (FTC)) and efavirenz (EFV) is the current treatment of choice. The  
44 phasing out of stavudine (D4T) and nevirapine (NVP) was almost complete in 2014 (Table  
45 2). East Africa and Southern Africa are currently rolling out dolutegravir (DTG), an  
46 integrase inhibitor with a high barrier to resistance [18][19]. Due to concerns about an  
47 increased risk of neural tube defects if taken during pregnancy[20], the roll-out to women  
48 has been delayed or limited in some settings. Of note, drug stock-outs in the last 12  
49  
50  
51  
52  
53  
54  
55  
56  
57

1  
2  
3 months were reported by 59 facilities for first-line drugs, and by 45 for second-line drugs  
4  
5 (Table 1).

### 6 7 ***Mortality and retention in care***

8  
9 In cohorts of PLWHIV who initiated ART in consecutive two-year periods from 2001 to  
10  
11 2016, mortality at 3 years declined substantially in all African leDEA regions (Figure 3A).  
12  
13 Loss to follow-up, defined as more than 90 days late to the next scheduled visit, remained  
14  
15 substantial in all regions, and particularly high in Southern Africa (Figure 3B). Retention  
16  
17 in care is key to the success of the public health approach to ART. Loss to follow-up has  
18  
19 been an important issue for leDEA, and activities to trace PLWHIV not returning to the  
20  
21 clinic have increased in recent years. At present, tracing of PLWHIV on ART who were  
22  
23 lost to follow-up is in place in 89% of the active facilities; 75% have implemented it  
24  
25 routinely (Table 1). Tracing methods vary widely across facilities and include phone calls  
26  
27 and home visits by clinic staff or community health workers.

### 28 29 ***Patient and public involvement***

30  
31 leDEA is based on the collection of routine clinical data and no patients were involved in  
32  
33 developing the research question, outcome measures and overall design of the  
34  
35 collaboration. Due to the anonymous nature of the data, we cannot disseminate the results  
36  
37 of analyses of the data directly to study participants.

## 38 39 **KEY RESEARCH AREAS AND PUBLICATIONS**

40  
41 Over 500 publications in MEDLINE acknowledge funding from a core grant from the NIH  
42  
43 to one or several African leDEA regions, and these publications have been cited over  
44  
45 10,000 times. Multiregional projects are developed in leDEA working groups, which  
46  
47 currently address eight clinical areas: (i) cancer, (ii) ART outcomes, (iii) hepatitis, (iv)  
48  
49 mental health, (v) mother-infant and paediatrics, (vi) renal disease, (vii) substance use  
50  
51 and (viii) tuberculosis. Multiregional research concepts are discussed in the Executive  
52  
53 Committee of leDEA, revised and approved or rejected. In recent years, several analyses  
54  
55 were done in collaboration with WHO or UNAIDS [21–23]. The number of publications  
56  
57 reporting multi-regional analyses from several African leDEA regions increased over time,  
58  
59 from one such publication in 2007 to 24 multiregional publications in 2018. Some of the  
60

1  
2  
3 key studies are summarised below, with a focus on more recent and on multiregional  
4 analyses.  
5

6  
7 **Treatment outcomes in adults, adolescents, children and pregnant women:** Several  
8 studies examined outcomes in people living with HIV-1 or HIV-2 who initiate ART,  
9 including determinants of mortality, of switching to second-line and third-line ART, drug  
10 resistance, loss to follow-up and the immunological and virological response to different  
11 ART regimens [24–37]. For example, the African leDEA regions contributed importantly  
12 to a large-scale analysis of outcomes in adolescents living with perinatally acquired HIV,  
13 which showed that HIV-associated mortality during adolescence was substantially higher  
14 in sub-Saharan Africa, South and Southeast Asia, and South America and the Caribbean  
15 than in Europe [36]. A similar analysis of adolescents living with HIV showed that mortality  
16 and loss to follow-up were worse among those entering care at 15 years or older [37]. The  
17 authors concluded that adolescents must be evaluated separately from younger children  
18 and adults to identify population-specific reasons for death and loss to follow-up [37].  
19  
20  
21  
22  
23  
24  
25  
26  
27

28 **Programme-level mortality:** It became clear early on during the scale-up of ART in sub-  
29 Saharan Africa, that loss to follow-up of patients initiating ART was substantial [38], and  
30 that mortality among patients lost was higher than among patients remaining in care [39].  
31 Ignoring loss to follow-up might thus bias programme-level estimates of mortality, and  
32 much effort has gone into correcting programme-level mortality for loss to follow-up [40–  
33 46]. For example, an analysis of all four African regions showed that when analysing the  
34 uncorrected data observed in the clinics, 52% of adults and children were retained on  
35 ART, 42% were lost to follow-up and 6% had died 5 years after ART initiation [46]. After  
36 accounting for undocumented deaths and self-transfers, an estimated 67% of patients  
37 were retained on ART, 19% had stopped ART and 15% had died [46].  
38  
39  
40  
41  
42  
43  
44  
45

46 **Co-infections and co-morbidities:** leDEA investigators have examined the prevalence  
47 and impact of co-infection with hepatitis B and C, and the epidemiology of different  
48 cancers and of (multi-drug resistant) tuberculosis, renal disease and of mental illness  
49 [8,47–58]. For example, an analysis of leDEA data and data from the Collaboration of  
50 Observational HIV Epidemiological Research in Europe (COHERE) [59] showed that  
51 children living with HIV from sub-Saharan Africa, but not those from Europe or Asia had a  
52 high risk of developing Kaposi sarcoma after starting ART [58]. Similarly, a recent analysis  
53  
54  
55  
56  
57  
58  
59  
60

of leDEA and COHERE data showed that compared to European women, rates of cervical cancer were 11 times higher in South Africa [50]. A recent multiregional study of multi-drug resistant tuberculosis included HIV positive and HIV negative adults with tuberculosis from seven high-burden countries (Côte d'Ivoire, Democratic Republic of the Congo, Kenya, Nigeria, South Africa, Peru, and Thailand). Molecular or phenotypic drug susceptibility testing was done locally and at a reference laboratory. The results showed that inaccurate local drug susceptibility testing led to under-treatment of drug-resistant tuberculosis and increased mortality [54].

***The challenge of “Treat All”:*** Nearly all countries in sub-Saharan Africa have now adopted national policies to offer ART to all PLWHIV regardless of CD4 cell count or clinical stage (‘Treat All’), in order to meet the UNAIDS 90-90-90 targets. In 2011, Malawi was one of the first countries to implement such a strategy for the prevention of mother-to-child transmission (PMTCT), recommending ART for pregnant and breastfeeding women living with HIV, regardless of CD4 cell count or WHO clinical stage (“Option B+”). An leDEA analysis of the Malawian experience showed that poor retention in care was a problem in many facilities, with early loss to follow-up particularly high in facilities with a high patient volume and in patients who start ART during pregnancy on the day of HIV diagnosis [35]. More recently, leDEA investigators used regression discontinuity analysis to examine changes in rapid HIV treatment initiation after national “Treat All” policy adoption in six countries (Burundi, Kenya, Malawi, Rwanda, Uganda, Zambia) [60]. They showed a strong and sustained effect of the adoption of “Treat All” policies on ART initiation within 30 days of enrollment in HIV care in all six countries [60].

## THE FUTURE

At the end of 2018, leDEA published a consensus statement [61] and a journal supplement [62] on research priorities to inform the implementation of the “Treat All” policy in children and adolescents [63], pregnant and post-partum women [64], and for mental health, substance use [65] and drug resistance [66]. These documents will guide leDEA’s future research agenda in sub-Saharan Africa. Furthermore, the creation of an leDEA Sentinel Research Network (leDEA-SRN) will facilitate the collection of detailed data in selected leDEA sites on cardio-metabolic risk factors (e.g. hypertension, diabetes,

1  
2  
3 dyslipidaemia) liver disease (liver fibrosis and steatosis) , mental health and substance  
4 use. In the East and Southern African regions, pharmacovigilance in pregnancy is being  
5 developed to assess the impact of ART on birth outcomes. A project involving all four  
6 African regions studies the cascade of screening for cervical cancer, while the  
7 establishment of the South African HIV Cancer Match (SAM) study of over ten million  
8 PLWHIV, from linkage of national laboratory with cancer registry data, will allow the study  
9 of less common cancers. Finally, the creation of a drug resistance database as a central  
10 repository for resistance tests performed in routine clinical care is another planned  
11 addition.  
12  
13  
14  
15  
16  
17  
18

## 19 **COLLABORATIONS**

20  
21  
22 The African regions of leDEA have collaborated and continue to encourage collaborations  
23 with other consortia, cohort collaborations, the HIV modelling community and public health  
24 agencies as well as individuals wishing to use leDEA data. Examples include work with  
25 COHERE [50,58,67,68], the Collaborative Initiative for Paediatric HIV Education and  
26 Research (CIPHER) collaboration [36,69] or the Measurement & Surveillance of HIV  
27 Epidemics (MeSH) consortium [22] as well as UNAIDS [22,23] and WHO [21]. Further  
28 collaborations are welcome. Investigators wishing to work with the leDEA data should  
29 contact the teams at the regional data centres (see [www.iedea.org](http://www.iedea.org) for contact details) and  
30 send a concept sheet for the analyses they are interested in performing and the variables  
31 that would be required. Anyone wishing to work with leDEA must sign a data-use  
32 agreement.  
33  
34  
35  
36  
37  
38  
39  
40  
41  
42  
43  
44  
45  
46  
47  
48  
49  
50  
51  
52  
53  
54  
55  
56  
57  
58  
59  
60

## FOOTNOTES

*Acknowledgements:* The authors wish to thank the clinical and administrative staff at the participating clinics. We are grateful to all PLWHIV who contributed to the IeDEA database.

*Contributors:* FC, PMG, and ME conceptualised the study. FC and CHDO performed statistical analyses. FC and ME wrote the first draft of the paper. CHDO, KA, AJ, EB, SB, FD, MAD, SND, KM, BSM, DN, KWK, CY, PMG and ME contributed to interpreting the data and to the writing and revising of the manuscript.

*Funding:* The International Epidemiology Databases to Evaluate AIDS (IeDEA) is supported by the U.S. National Institutes of Health's National Institute of Allergy and Infectious Diseases, the Eunice Kennedy Shriver National Institute of Child Health and Human Development, the National Cancer Institute, the National Institute of Mental Health, the National Institute on Drug Abuse and Alcoholism, the National Institute of Diabetes and Digestive and Kidney Diseases, the Fogarty International Center, the National Library of Medicine, and the Office of the Director: Central Africa, U01AI096299; East Africa, U01AI069911; Southern Africa, U01AI069924; West Africa, U01AI069919. Informatics resources are supported by the Harmonist project, R24AI124872. ME was supported by special project funding (Grant No. 174281) from the Swiss National Science Foundation.

*Disclaimer:* The contents are the responsibility of the authors and do not necessarily reflect the views of NIAD or the US Government. The funders had no role in study design, data collection and analysis, decision to publish or preparation of the manuscript.

*Competing interests:* None declared.

*Ethics approval:* Ethics Committee of the Canton of Bern, Switzerland.

*Provenance and peer review:* Not commissioned; externally peer reviewed.

*Data sharing statement:* Investigators wishing to work with IeDEA data should contact the regional data centres (see [www.iedea.org](http://www.iedea.org)) and send a concept sheet for the analyses they are interested in performing and the variables that would be required. See

1  
2  
3 [www.iedeades.org](http://www.iedeades.org) for list of variables. Those wishing to work with the data must sign a  
4 data-use agreement.  
5

6  
7 *Open Access:* This is an Open Access article distributed in accordance with the Creative  
8 Commons Attribution Non Commercial (CC BY-NC 4.0) license, which permits others to  
9 distribute, remix, adapt, build upon this work non-commercially, and license their  
10 derivative works on different terms, provided the original work is properly cited and the  
11 use is non-commercial. See: <http://creativecommons.org/licenses/by-nc/4.0/>.  
12  
13  
14  
15  
16  
17  
18  
19  
20  
21  
22  
23  
24  
25  
26  
27  
28  
29  
30  
31  
32  
33  
34  
35  
36  
37  
38  
39  
40  
41  
42  
43  
44  
45  
46  
47  
48  
49  
50  
51  
52  
53  
54  
55  
56  
57  
58  
59  
60



### Box: Strengths and limitations of this study

- An important strength of the leDEA cohort collaboration in sub-Saharan Africa is its large size, which allows analyses of outcomes of antiretroviral therapy (ART) in children, adolescents and pregnant and postpartum women, across diverse settings.
- The data reflect routine care across a wide range of real-world settings during the scale up of ART in sub-Saharan Africa and thus provide a valuable platform to conduct operational and clinical research and to study temporal trends and the impact of changes in guidelines and other interventions.
- The development of a standardised Data Exchange Standard protocol has contributed to increase data quality, and data have been enriched by linkage to cancer registries, vital registries and administrative databases.
- Collaborations with the World Health Organization, UNAIDS, the mathematical modelling community and other consortia have ensured that the analyses of the African leDEA regions contributed substantially to global health policy and decision making.
- Weaknesses include the limitations inherent in secondary use of routine clinical care data, with missing data, the lack of standardised follow-up visits, and substantial loss to follow-up resulting in unknown outcome.
- Additional challenges include the lack of population-based samples, including HIV negative controls or ART-naive comparison groups, and the lack of measurements such as non-communicable disease risk factors and outcomes. Dealing with risk factors that affect clinical decision making, and the need to control for (time-dependent) confounding can also be challenging.



## REFERENCES

- 1 UNAIDS. Global AIDS update 2016. Geneva, Switzerland: 2016.
- 2 UNAIDS. UNAIDS Data 2018. UNAIDS <https://www.aidsdatahub.org/unaid-data-2018-unaid-2018>
- 3 UNAIDS. 90-90-90: An ambitious treatment target to help end the AIDS epidemic. Geneva, Switzerland: 2014.
- 4 UNAIDS. Ending AIDS. Progress towards the 90-90-90- targets. Geneva, Switzerland: 2017.
- 5 Egger M, Ekouevi DK, Williams C, *et al.* Cohort Profile: The international epidemiological databases to evaluate AIDS (IeDEA) in sub-Saharan Africa. *Int J Epidemiol* 2012;**41**:1256–64. doi:10.1093/ije/dyr080
- 6 Harris PA, Taylor R, Minor BL, *et al.* The REDCap consortium: Building an international community of software platform partners. *J Biomed Inform* 2019;**95**:103208. doi:10.1016/j.jbi.2019.103208
- 7 Duda SNSN, Farr AMAM, Lindegren MLML, *et al.* Characteristics and comprehensiveness of adult HIV care and treatment programmes in Asia-Pacific, sub-Saharan Africa and the Americas: results of a site assessment conducted by the International epidemiologic Databases to Evaluate AIDS Collaboration. *J Int AIDS Soc* 2014;**17**:19045. doi:10.7448/IAS.17.1.19045
- 8 Parcesepe AM, Mugglin C, Nalugoda F, *et al.* Screening and management of mental health and substance use disorders in HIV treatment settings in low- and middle-income countries within the global IeDEA consortium. *J Int AIDS Soc* 2018;**21**:e25101. doi:10.1002/jia2.25101
- 9 Ballif M, Nhandu V, Wood R, *et al.* Detection and management of drug-resistant tuberculosis in HIV-infected patients in lower-income countries. *Int J Tuberc Lung Dis Off J Int Union Tuberc Lung Dis* 2014;**18**:1327–36. doi:10.5588/ijtld.14.0106
- 10 Fenner L, Forster M, Boule A, *et al.* Tuberculosis in HIV programmes in lower-income countries: practices and risk factors. *Int J Tuberc Lung Dis Off J Int Union Tuberc Lung Dis* 2011;**15**:620–7. doi:10.5588/ijtld.10.0249
- 11 Ballif M, Renner L, Claude Dusingize J, *et al.* Tuberculosis in Pediatric Antiretroviral Therapy Programs in Low- and Middle-Income Countries: Diagnosis and Screening Practices. *J Pediatr Infect Dis Soc* 2015;**4**:30–8. doi:10.1093/jpids/piu020
- 12 Horner M-J, Chasimpha S, Spoerri A, *et al.* High Cancer Burden Among Antiretroviral Therapy Users in Malawi: a Record Linkage Study of Observational HIV Cohorts and Cancer Registry Data. *Clin Infect Dis* Published Online First: 17 November 2018. doi:10.1093/cid/ciy960
- 13 Dhokotera T, Bohlius J, Spoerri A, *et al.* The burden of cancers associated with HIV in the South African public health sector, 2004-2014: a record linkage study. *Infect Agent Cancer* 2019;**14**:12. doi:10.1186/s13027-019-0228-7

- 1  
2  
3 14 Boulle A, Schomaker M, May MT, *et al.* Mortality in patients with HIV-1 infection starting  
4 antiretroviral therapy in South Africa, Europe, or North America: a collaborative analysis of  
5 prospective studies. *PLoS Med* 2014;**11**:e1001718. doi:10.1371/journal.pmed.1001718  
6
- 7 15 Davies M-A, Tsondai P, Tiffin N, *et al.* Where do HIV-infected adolescents go after transfer?  
8 - Tracking transition/transfer of HIV-infected adolescents using linkage of cohort data to a  
9 health information system platform. *J Int AIDS Soc* 2017;**20**:21668.  
10 doi:10.7448/IAS.20.4.21668  
11
- 12 16 WHO. Consolidated guidelines on the use of antiretroviral drugs for treating and preventing  
13 HIV infection: recommendations for a public health approach. Geneva, Switzerland: 2013.  
14
- 15 17 (PEPFAR). PEPFAR 2018 Country Operational Plan Guidance for Standard Process  
16 Countries Table of Contents. 2018.  
17
- 18 18 Cottrell ML, Hadzic T, Kashuba ADM. Clinical Pharmacokinetic, Pharmacodynamic and  
19 Drug-Interaction Profile of the Integrase Inhibitor Dolutegravir. *Clin Pharmacokinet*  
20 2013;**52**:981–94. doi:10.1007/s40262-013-0093-2  
21
- 22 19 Mesplede T, Quashie PK, Osman N, *et al.* Viral fitness cost prevents HIV-1 from evading  
23 dolutegravir drug pressure. *Retrovirology* 2013;**10**:22. doi:10.1186/1742-4690-10-22  
24
- 25 20 Zash R, Holmes L, Diseko M, *et al.* Neural-Tube Defects and Antiretroviral Treatment  
26 Regimens in Botswana. *N Engl J Med* 2019;:NEJMoa1905230.  
27 doi:10.1056/NEJMoa1905230  
28
- 29 21 Zaniewski E, Tymejczyk O, Kariminia A, *et al.* IeDEA-WHO Research-Policy Collaboration:  
30 contributing real-world evidence to HIV progress reporting and guideline development. *J*  
31 *Virus Erad* 2018;**4**:9–15.  
32
- 33 22 Anderegg N, Johnson LF, Zaniewski E, *et al.* All-cause mortality in HIV-positive adults  
34 starting combination antiretroviral therapy: correcting for loss to follow-up. *AIDS Lond Engl*  
35 2017;**31 Suppl 1**:S31–40. doi:10.1097/QAD.0000000000001321  
36
- 37 23 Mahy M, Penazzato M, Ciaranello A, *et al.* Improving estimates of children living with HIV  
38 from the Spectrum AIDS Impact Model. *AIDS Lond Engl* 2017;**31 Suppl 1**:S13–22.  
39 doi:10.1097/QAD.0000000000001306  
40
- 41 24 Davies M-AM-AA, May M, Bolton-Moore C, *et al.* Prognosis of Children With HIV-1 Infection  
42 Starting Antiretroviral Therapy in Southern Africa. *Pediatr Infect Dis J* 2014;**33**:608–16.  
43 doi:10.1097/INF.0000000000000214  
44
- 45 25 Petersen ML, Tran L, Geng EH, *et al.* Delayed switch of antiretroviral therapy after virologic  
46 failure associated with elevated mortality among HIV-infected adults in Africa. *AIDS Lond*  
47 *Engl* 2014;**28**:2097–107. doi:10.1097/QAD.0000000000000349  
48
- 49 26 Tchounga BK, Hønge BL, Eholie SP, *et al.* Effect of sex and age on outcomes among HIV-2-  
50 infected patients starting antiretroviral therapy in West Africa. *AIDS Lond Engl*  
51 2016;**30**:2707–14. doi:10.1097/QAD.0000000000001232  
52
- 53 27 Giles ML, Achhra AC, Abraham AG, *et al.* Sex-based differences in antiretroviral therapy  
54 initiation, switching and treatment interruptions: global overview from the International  
55  
56  
57

- 1  
2  
3 Epidemiologic Databases to Evaluate AIDS (IeDEA). *J Int AIDS Soc* 2018;**21**:e25149.  
4 doi:10.1002/jia2.25149  
5
- 6 28 Haas AD, Keiser O, Balestre E, *et al*. Monitoring and switching of first-line antiretroviral  
7 therapy in adult treatment cohorts in sub-Saharan Africa: Collaborative analysis. *Lancet HIV*  
8 2015;**2**:e271–e278. doi:10.1016/S2352-3018(15)00087-9  
9
- 10 29 Chimbetete C, Katzenstein D, Shamu T, *et al*. HIV-1 Drug Resistance and Third-Line  
11 Therapy Outcomes in Patients Failing Second-Line Therapy in Zimbabwe. *Open Forum*  
12 *Infect Dis* 2018;**5**:1–8. doi:10.1093/ofid/ofy005  
13
- 14 30 Wools-Kaloustian K, Marete I, Ayaya S, *et al*. Time to First-Line ART Failure and Time to  
15 Second-Line ART Switch in the IeDEA Pediatric Cohort. *J AIDS-J Acquir Immune Defic Syndr*  
16 2018;**78**:221–30. doi:10.1097/QAI.0000000000001667  
17
- 18 31 Charpentier C, Eholié S, Anglaret X, *et al*. Genotypic resistance profiles of HIV-2-treated  
19 patients in West Africa. *AIDS Lond Engl* 2014;**28**:1161–9.  
20 doi:10.1097/QAD.0000000000000244  
21
- 22 32 Kiragga AN, Lok JJ, Musick BS, *et al*. CD4 trajectory adjusting for dropout among HIV-  
23 positive patients receiving combination antiretroviral therapy in an East African HIV care  
24 centre. *J Int AIDS Soc* 2014;**17**:18957. doi:10.7448/IAS.17.1.18957  
25
- 26 33 Geng EH, Neilands TB, Thiébaut R, *et al*. CD41 T cell recovery during suppression of HIV  
27 replication: an international comparison of the immunological efficacy of antiretroviral  
28 therapy in North America, Asia and Africa. *Int J Epidemiol* 2015;**44**:251–63.  
29 doi:10.1093/ije/dyu271  
30
- 31 34 Technau K-G, Schomaker M, Kuhn L, *et al*. Virologic response in children treated with  
32 abacavir-compared with stavudine-based antiretroviral treatment: a South African multi-  
33 cohort analysis. *Pediatr Infect Dis J* 2014;**33**:617–22. doi:10.1097/INF.0000000000000222  
34
- 35 35 Tenthani L, Haas AD, Tweya H, *et al*. Retention in care under universal antiretroviral therapy  
36 for HIV-infected pregnant and breastfeeding women ('Option B+') in Malawi. *AIDS*  
37 2014;**28**:589–598 Keywords:  
38  
39
- 40 36 Collaborative Initiative for Paediatric HIV Education and Research (CIPHER) Global Cohort  
41 Collaboration, Slogrove AL, Schomaker M, *et al*. The epidemiology of adolescents living with  
42 perinatally acquired HIV: A cross-region global cohort analysis. *PLoS Med*  
43 2018;**15**:e1002514. doi:10.1371/journal.pmed.1002514  
44
- 45 37 Kariminia A, Law M, Davies M, *et al*. Mortality and losses to follow-up among adolescents  
46 living with HIV in the Ie DEA global cohort collaboration. *J Int AIDS Soc* 2018;**21**:e25215.  
47 doi:10.1002/jia2.25215  
48
- 49 38 Rosen S, Fox MP, Gill CJ. Patient retention in antiretroviral therapy programs in sub-  
50 Saharan Africa: a systematic review. *PLoS Med* 2007;**4**:e298.  
51
- 52 39 Brinkhof MWGWMWG, Pujades-Rodriguez M, Egger M. Mortality of patients lost to follow-up  
53 in antiretroviral treatment programmes in resource-limited settings: systematic review and  
54 meta-analysis. *PLoS One* 2009;**4**:e5790. doi:10.1371/journal.pone.0005790  
55  
56  
57

- 1  
2  
3 40 Geng EH, Odeny TA, Lyamuya RE, *et al.* Estimation of mortality among HIV-infected people  
4 on antiretroviral treatment in east Africa: a sampling based approach in an observational,  
5 multisite, cohort study. *Lancet HIV* 2015;**2**:e107–16. doi:10.1016/S2352-3018(15)00002-8  
6  
7 41 An M-W, Frangakis CE, Yiannoutsos CT. Choosing profile double-sampling designs for  
8 survival estimation with application to President's Emergency Plan for AIDS Relief  
9 evaluation. *Stat Med* 2014;**33**:2017–29. doi:10.1002/sim.6087  
10  
11 42 Schomaker M, Gsponer T, Estill J, *et al.* Non-ignorable loss to follow-up: correcting mortality  
12 estimates based on additional outcome ascertainment. *Stat Med* 2014;**33**:129–142.  
13 doi:10.1002/sim.5912  
14  
15 43 Brinkhof MWG, Spycher BD, Yiannoutsos C, *et al.* Adjusting mortality for loss to follow-up:  
16 Analysis of five art programmes in sub-saharan africa. *PLoS ONE* 2010;**5**:3–8.  
17 doi:10.1371/journal.pone.0014149  
18  
19 44 Egger M, Spycher BD, Sidle J, *et al.* Correcting mortality for loss to follow-up: a nomogram  
20 applied to antiretroviral treatment programmes in sub-Saharan Africa. *PLoS Med*  
21 2011;**8**:e1000390. doi:10.1371/journal.pmed.1000390  
22  
23 45 Yiannoutsos CT, Johnson LF, Boulle A, *et al.* Estimated mortality of adult HIV-infected  
24 patients starting treatment with combination antiretroviral therapy. *Sex Transm Infect*  
25 2012;**88 Suppl 2**:i33—43.  
26  
27 46 Haas AD, Zaniewski E, Anderegg N, *et al.* Retention and mortality on antiretroviral therapy in  
28 sub-Saharan Africa: collaborative analyses of HIV treatment programmes. *J Int AIDS Soc*  
29 2018;**21**:e25084. doi:10.1002/jia2.25084  
30  
31 47 Hector J, Vinikoor M, Chilengi R, *et al.* No Impact of Hepatitis B Virus Infection on Early  
32 Mortality Among Human Immunodeficiency Virus–Infected Patients in Southern Africa. *Clin*  
33 *Infect Dis* 2018;**67**:1310–1311. doi:10.1093/cid/ciy304  
34  
35 48 Wandeler G, Mulenga L, Hobbins M, *et al.* Absence of Active Hepatitis C Virus Infection in  
36 Human Immunodeficiency Virus Clinics in Zambia and Mozambique. *Open Forum Infect Dis*  
37 2016;**3**:ofw049. doi:10.1093/ofid/ofw049  
38  
39 49 Jaquet A, Wandeler G, Nouaman M, *et al.* Alcohol use, viral hepatitis and liver fibrosis  
40 among HIV-positive persons in West Africa: A cross-sectional study. *J Int AIDS Soc*  
41 2017;**20**:21424. doi:10.7448/IAS.20.1.21424  
42  
43 50 Rohner E, Bütikofer L, Schmidlin K, *et al.* Cervical cancer risk in women living with HIV  
44 across four continents: A multicohort study: Regional cervical cancer risk in HIV-positive  
45 women. *Int J Cancer* Published Online First: 19 June 2019. doi:10.1002/ijc.32260  
46  
47 51 Brown SA, Abbas S, Davies M-A, *et al.* Brief Report: Pediatric Cancer Burden and  
48 Treatment Resources Within the Pediatric IeDEA Consortium. *J Acquir Immune Defic Syndr*  
49 1999 2017;**76**:60–4. doi:10.1097/QAI.0000000000001453  
50  
51 52 Semeere A, Wenger M, Busakhala N, *et al.* A prospective ascertainment of cancer incidence  
52 in sub-Saharan Africa: The case of Kaposi sarcoma. *Cancer Med* 2016;**5**:914–28.  
53 doi:10.1002/cam4.618  
54  
55  
56  
57  
58  
59  
60

- 1  
2  
3 53 Carlucci JG, Blevins Peratikos M, Kipp AM, *et al.* Tuberculosis Treatment Outcomes Among  
4 HIV/TB-Coinfected Children in the International Epidemiology Databases to Evaluate AIDS  
5 (IeDEA) Network. *J Acquir Immune Defic Syndr* 1999 2017;**75**:156–63.  
6 doi:10.1097/QAI.0000000000001335  
7
- 8 54 Zurcher K, Ballif M, Fenner L, *et al.* Drug susceptibility testing and mortality in patients  
9 treated for tuberculosis in high-burden countries: a multicentre cohort study. *Lancet Infect*  
10 *Dis* 2019;**19**:298–307. doi:10.1016/S1473-3099(18)30673-X  
11
- 12 55 Gygli SM, Keller PM, Ballif M, *et al.* Whole-Genome Sequencing for Drug Resistance Profile  
13 Prediction in Mycobacterium tuberculosis. *Antimicrob Agents Chemother* 2019;**63**:e02175-  
14 18. doi:10.1128/AAC.02175-18  
15
- 16 56 Zürcher K, Ballif M, Kiertiburanakul S, *et al.* Diagnosis and clinical outcomes of  
17 extrapulmonary tuberculosis in antiretroviral therapy programmes in low- and middle-income  
18 countries: a multicohort study. *J Int AIDS Soc* 2019;**22**:e25392. doi:10.1002/jia2.25392  
19
- 20 57 Mulenga L, Musonda P, Mwangi A, *et al.* Effect of baseline renal function on tenofovir-  
21 containing antiretroviral therapy outcomes in Zambia. *Clin Infect Dis Off Publ Infect Dis Soc*  
22 *Am* 2014;**58**:1473–80. doi:10.1093/cid/ciu117  
23
- 24 58 Rohner E, Schmidlin K, Zwahlen M, *et al.* Kaposi Sarcoma Risk in HIV-Infected Children and  
25 Adolescents on Combination Antiretroviral Therapy From Sub-Saharan Africa, Europe, and  
26 Asia. *Clin Infect Dis* 2016;**63**:ciw519. doi:10.1093/cid/ciw519  
27
- 28 59 Chêne G, Phillips A, Costagliola D, *et al.* Cohort profile: Collaboration of Observational HIV  
29 Epidemiological Research Europe (COHERE) in EuroCoord. *Int J Epidemiol* 2017;**46**:797.  
30 doi:10.1093/ije/dyw211  
31
- 32 60 Tymejczyk O, Brazier E, Yiannoutsos CT, *et al.* Changes in rapid HIV treatment initiation  
33 after national “treat all” policy adoption in 6 sub-Saharan African countries: Regression  
34 discontinuity analysis. *PLOS Med* 2019;**16**:e1002822. doi:10.1371/journal.pmed.1002822  
35
- 36 61 Yotebieng M, Brazier E, Addison D, *et al.* Research priorities to inform “Treat All” policy  
37 implementation for people living with HIV in sub-Saharan Africa: a consensus statement  
38 from the International epidemiology Databases to Evaluate AIDS (IeDEA). *J Int AIDS Soc*  
39 2019;**22**:e25218. doi:10.1002/jia2.25218  
40
- 41 62 Nash D, Yotebieng M, Sohn AH. Treating all people living with HIV in sub-Saharan Africa: a  
42 new era calling for new approaches. *J Virus Erad* 2018;**4**:1–4.  
43
- 44 63 Enane LA, Davies M-A, Leroy V, *et al.* Traversing the cascade: urgent research priorities for  
45 implementing the “treat all” strategy for children and adolescents living with HIV in sub-  
46 Saharan Africa. *J Virus Erad* 2018;**4**:40–46.  
47
- 48 64 Abuogi LL, Humphrey JM, Mpody C, *et al.* Achieving UNAIDS 90-90-90 targets for pregnant  
49 and postpartum women in sub-Saharan Africa: progress, gaps and research needs. *J Virus*  
50 *Erad* 2018;**4**:33–9.  
51
- 52 65 Lancaster KE, Hetrick A, Jaquet A, *et al.* Substance use and universal access to HIV testing  
53 and treatment in sub-Saharan Africa: implications and research priorities. *J Virus Erad*  
54 2018;**4**:26–32.  
55  
56  
57  
58  
59  
60



- 1  
2  
3 66 de Waal R, Lessells R, Hauser A, *et al.* HIV drug resistance in sub-Saharan Africa: public  
4 health questions and the potential role of real-world data and mathematical modelling. *J*  
5 *Virus Erad* 2018;**4**:55–8.  
6
- 7 67 Panayidou K, Davies M-A, Anderegg N, *et al.* Global temporal changes in the proportion of  
8 children with advanced disease at the start of combination antiretroviral therapy in an era of  
9 changing criteria for treatment initiation. *J Int AIDS Soc* 2018;**21**:e25200.  
10 doi:10.1002/jia2.25200  
11
- 12 68 Anderegg N, Panayidou K, Abo Y, *et al.* Global Trends in CD4 Cell Count at the Start of  
13 Antiretroviral Therapy: Collaborative Study of Treatment Programs. *Clin Infect Dis*  
14 2018;**66**:893–903. doi:10.1093/cid/cix915  
15
- 16 69 Collaborative Initiative for Paediatric HIV Education and Research (CIPHER) Global Cohort  
17 Collaboration. Incidence of switching to second-line antiretroviral therapy and associated  
18 factors in children with HIV: an international cohort collaboration. *Lancet HIV* 2019;**6**:e105–  
19 15. doi:10.1016/S2352-3018(18)30319-9  
20  
21  
22  
23  
24  
25  
26  
27  
28  
29  
30  
31  
32  
33  
34  
35  
36  
37  
38  
39  
40  
41  
42  
43  
44  
45  
46  
47  
48  
49  
50  
51  
52  
53  
54  
55  
56  
57  
58  
59  
60

**Table 1: Characteristics of 240 facilities providing ART in the African regions if the leDEA (source: site assessment survey 2017).**

|                                                   | West Africa | Central Africa | East Africa | Southern Africa | All regions (%) |
|---------------------------------------------------|-------------|----------------|-------------|-----------------|-----------------|
| <b>No of active facilities</b>                    | 17          | 19             | 72          | 132             | 240             |
| <b>Location</b>                                   |             |                |             |                 |                 |
| Urban                                             | 17          | 19             | 19          | 65              | 120 (50)        |
| Rural                                             | 0           | 0              | 52          | 67              | 119 (50)        |
| <b>Level of care</b>                              |             |                |             |                 |                 |
| Primary                                           | 4           | 12             | 49          | 107             | 172 (74)        |
| Secondary                                         | 1           | 0              | 16          | 20              | 37 (16)         |
| Tertiary                                          | 12          | 7              | 6           | 5               | 24 (10)         |
| <b>Type of facility</b>                           |             |                |             |                 |                 |
| Public                                            | 12          | 16             | 69          | 128             | 225 (95)        |
| Private                                           | 2           | 3              | 3           | 4               | 12 (5)          |
| <b>Viral load</b>                                 |             |                |             |                 |                 |
| Routine testing                                   | 12          | 16             | 46          | 74              | 148 (62)        |
| Results available within 15 days                  | 6           | 13             | 11          | 22              | 52 (22)         |
| Results available within 16-30 days               | 7           | 4              | 11          | 104             | 126 (53)        |
| Tests performed onsite                            | 8           | 6              | 4           | 3               | 21 (9)          |
| Tests performed offsite                           | 6           | 13             | 53          | 127             | 199 (83)        |
| <b>CD4 monitoring</b>                             |             |                |             |                 |                 |
| Routine testing                                   | 14          | 6              | 9           | 97              | 126 (53)        |
| Results available same day                        | 10          | 8              | 21          | 17              | 56 (23)         |
| Tests performed onsite                            | 11          | 8              | 23          | 51              | 93 (39)         |
| Tests performed offsite                           | 3           | 11             | 35          | 71              | 120 (50)        |
| <b>HIV-1 genotypic drug resistance</b>            |             |                |             |                 |                 |
| Routine testing                                   | 2           | 2              | 10          | 48              | 62 (26)         |
| <b>Routine tracing of LTFU</b>                    |             |                |             |                 |                 |
| Yes                                               | 13          | 19             | 56          | 93              | 181 (75)        |
| No                                                | 1           | 0              | 1           | 37              | 39 (16)         |
| <b>Tracing method*</b>                            |             |                |             |                 |                 |
| Phone                                             | 14          | 18             | 57          | 110             | 199             |
| SMS/mail/email                                    | 2           | 2              | 10          | 14              | 28              |
| Home visit                                        | 9           | 17             | 52          | 129             | 207             |
| <b>Medication disruption/stock outs last 12 m</b> |             |                |             |                 |                 |
| Pharmacy available on site                        | 14          | 19             | 56          | 96              | 185             |
| First-line ART                                    | 5           | 2              | 20          | 32              | 59              |
| Second-line ART                                   | 5           | 6              | 18          | 16              | 45              |

\*Sites may use more than 1 method

**Table 2: Proportion of patients with different nucleoside and non-nucleoside reverse transcriptase inhibitors regimen at ART start over time, by region.**

|              | Central Africa  |           |           |           |           |           |           |           | Eastern Africa |           |           |           |           |           |           |           |
|--------------|-----------------|-----------|-----------|-----------|-----------|-----------|-----------|-----------|----------------|-----------|-----------|-----------|-----------|-----------|-----------|-----------|
|              | 2001-2002       | 2003-2004 | 2005-2006 | 2007-2008 | 2009-2010 | 2011-2012 | 2013-2014 | 2015-2016 | 2001-2002      | 2003-2004 | 2005-2006 | 2007-2008 | 2009-2010 | 2011-2012 | 2013-2014 | 2015-2016 |
| <b>NRTI</b>  |                 |           |           |           |           |           |           |           |                |           |           |           |           |           |           |           |
| FTC+TDF      | -               | 1.2       | 4.4       | 0.8       | 3.5       | 5.0       | 6.6       | 9.2       | 0.8            | 5.4       | 0.3       | 1.0       | 0.9       | 1.1       | 1.4       | 0.7       |
| 3TC+TDF      | -               | 6.4       | 4.1       | 3.9       | 34.4      | 49.7      | 60.1      | 76.5      | 2.7            | 5.0       | 1.1       | 2.3       | 9.3       | 55.1      | 77.5      | 89.7      |
| 3TC+D4T      | -               | 60.0      | 55.6      | 33.7      | 8.8       | 2.7       | 0.1       | 0.0       | 78.9           | 80.0      | 83.2      | 54.1      | 37.4      | 3.0       | 0.5       | 0.1       |
| 3TC+AZT      | -               | 29.6      | 32.7      | 54.9      | 48.6      | 35.9      | 27.0      | 6.6       | 14.0           | 9.0       | 14.8      | 41.8      | 46.4      | 35.3      | 16.6      | 6.4       |
| 3TC+ABC      | -               | 1.1       | 1.4       | 2.1       | 2.8       | 4.1       | 5.1       | 7.3       | 0.6            | 0.3       | 0.4       | 0.8       | 5.9       | 5.4       | 4.0       | 3.2       |
| Other        | -               | 1.8       | 1.8       | 4.7       | 1.9       | 2.6       | 1.1       | 0.4       | 3.1            | 0.4       | 0.2       | 0.1       | 0.2       | 0.1       | 0.0       | 0.0       |
| <b>NNRTI</b> |                 |           |           |           |           |           |           |           |                |           |           |           |           |           |           |           |
| NVP          | -               | 64.1      | 65        | 73.6      | 66.6      | 49.2      | 22.5      | 6.3       | 73.1           | 82.6      | 80.9      | 76.4      | 72.2      | 50.4      | 21.3      | 8.1       |
| EFV          | -               | 35.7      | 34.3      | 25.8      | 32.9      | 50.1      | 76.9      | 93.4      | 24.8           | 15.4      | 17.7      | 22.6      | 27.2      | 49.3      | 78.4      | 91.5      |
| Other        | -               | 0.2       | 0.7       | 0.7       | 0.5       | 0.7       | 0.6       | 0.2       | 2.0            | 2.0       | 1.4       | 1.0       | 0.6       | 0.3       | 0.4       | 0.4       |
|              | Southern Africa |           |           |           |           |           |           |           | West Africa    |           |           |           |           |           |           |           |
|              | 2001-2002       | 2003-2004 | 2005-2006 | 2007-2008 | 2009-2010 | 2011-2012 | 2013-2014 | 2015-2016 | 2001-2002      | 2003-2004 | 2005-2006 | 2007-2008 | 2009-2010 | 2011-2012 | 2013-2014 | 2015-2016 |
| <b>NRTI</b>  |                 |           |           |           |           |           |           |           |                |           |           |           |           |           |           |           |
| FTC+TDF      | 2.0             | 0.5       | 0.5       | 17.4      | 24.9      | 34.4      | 62.2      | 51.9      | 0.6            | 0.0       | 0.1       | 1.5       | 11.5      | 17.6      | 11.5      | 11.6      |
| 3TC+TDF      | 2.5             | 1.1       | 1.1       | 2.1       | 17.1      | 33.5      | 22.2      | 40.3      | 0.0            | 0.0       | 0.2       | 0.6       | 3.5       | 10.3      | 32.1      | 55.3      |
| 3TC+D4T      | 37.2            | 47.7      | 55.3      | 49.5      | 36.5      | 15.3      | 3.4       | 0.2       | 39.2           | 46.8      | 51.6      | 42.6      | 21.6      | 4.8       | 0.6       | 0.0       |
| 3TC+AZT      | 47.0            | 39.7      | 27.7      | 16.2      | 10.7      | 8.7       | 6.8       | 2.5       | 35.7           | 39.7      | 43.3      | 51.0      | 46.2      | 53.4      | 49.3      | 22.5      |
| 3TC+ABC      | 0.7             | 0.2       | 0.3       | 1.2       | 5.0       | 6.0       | 4.9       | 5.0       | 0.2            | 0.1       | 0.4       | 0.9       | 0.9       | 4.1       | 5.8       | 10.3      |
| Other        | 10.6            | 10.9      | 15.1      | 13.6      | 5.8       | 2.2       | 0.5       | 0.1       | 24.3           | 13.4      | 4.5       | 3.4       | 16.3      | 9.8       | 0.6       | 0.3       |
| <b>NNRTI</b> |                 |           |           |           |           |           |           |           |                |           |           |           |           |           |           |           |
| NVP          | 51.1            | 58.1      | 64.8      | 55.4      | 47.2      | 36.7      | 15.6      | 3.7       | 10.1           | 12.0      | 40.9      | 46.1      | 50.2      | 47.0      | 36.1      | 15.0      |
| EFV          | 43.7            | 37.8      | 31.4      | 41.5      | 50.0      | 61.2      | 82.4      | 93.9      | 50.1           | 60.6      | 46.7      | 44.4      | 39.7      | 41.5      | 53.8      | 70.7      |
| Other        | 5.2             | 4.1       | 3.7       | 3.1       | 2.9       | 2.1       | 1.9       | 2.4       | 39.8           | 27.4      | 12.5      | 9.6       | 10.2      | 11.5      | 10.1      | 14.3      |

Abbreviation: NRTI, nucleoside reverse transcriptase inhibitor; NNRTI, non-nucleoside reverse transcriptase inhibitor



## Legends to Figures

Figure 1: Map of the 240 active facilities participating in the four African regions of the International epidemiology Databases to Evaluate AIDS (A), together with cumulative numbers of patients starting antiretroviral therapy (B).

Figure 2: Daily number of CD4 cell counts and viral load measurements over time (bar chart) and the number of patients in care (red line).

Figure 3. Trends in mortality (A) and loss to follow (B), 2001 to 2016.

1  
2  
3  
4  
5  
6  
7  
8  
9  
10  
11  
12  
13  
14  
15  
16  
17  
18  
19  
20  
21  
22  
23  
24  
25  
26  
27  
28  
29  
30  
31  
32  
33  
34  
35  
36  
37  
38  
39  
40  
41  
42  
43  
44  
45  
46  
47  
48  
49  
50  
51  
52  
53  
54  
55  
56  
57  
58  
59  
60

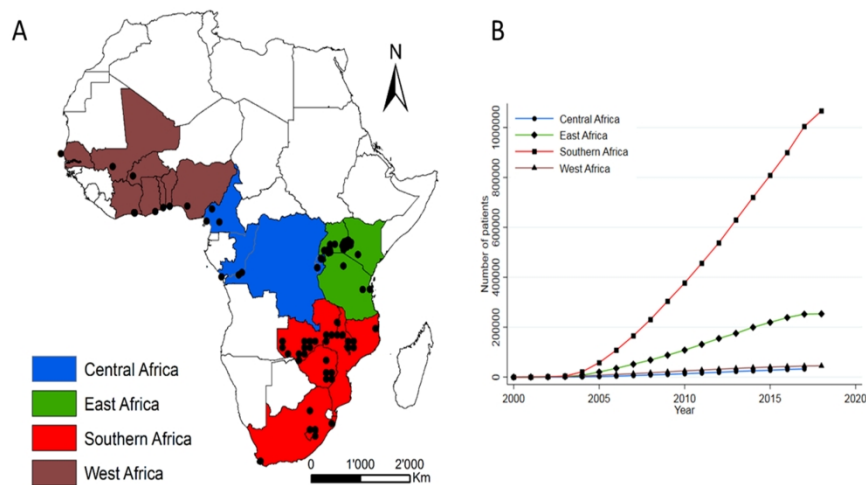

Figure 1. Map of the 240 active facilities participating in the four African regions of the International epidemiology Databases to Evaluate AIDS (A), together with cumulative numbers of patients starting antiretroviral therapy (B).

1  
2  
3  
4  
5  
6  
7  
8  
9  
10  
11  
12  
13  
14  
15  
16  
17  
18  
19  
20  
21  
22  
23  
24  
25  
26  
27  
28  
29  
30  
31  
32  
33  
34  
35  
36  
37  
38  
39  
40  
41  
42  
43  
44  
45  
46  
47  
48  
49  
50  
51  
52  
53  
54  
55  
56  
57  
58  
59  
60

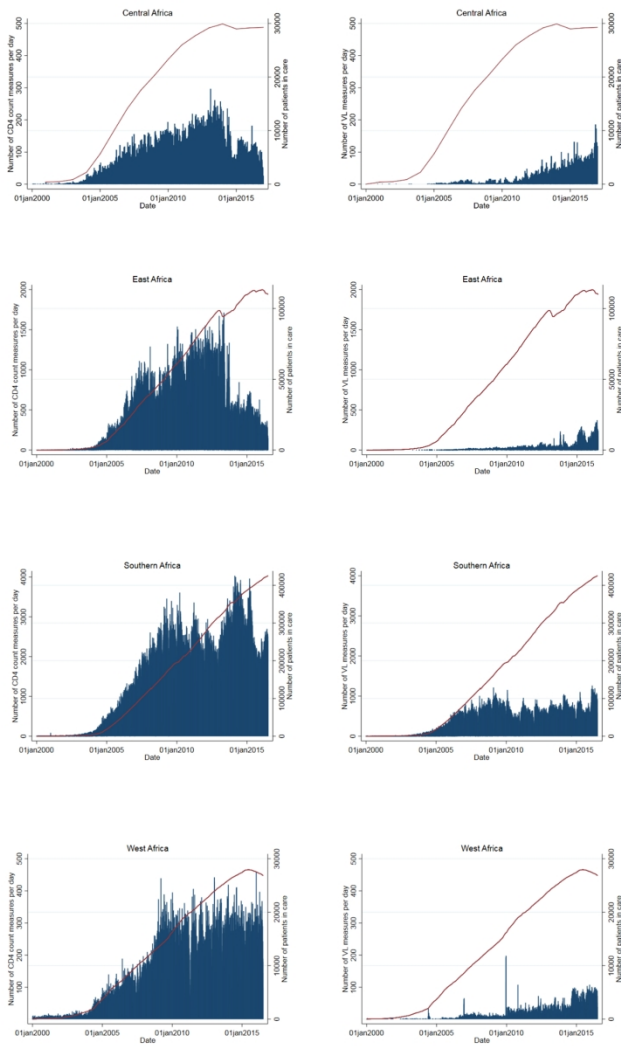

Figure 2. Daily number of CD4 cell counts and viral load measurements over time (bar chart) and the number of patients in care (red line).

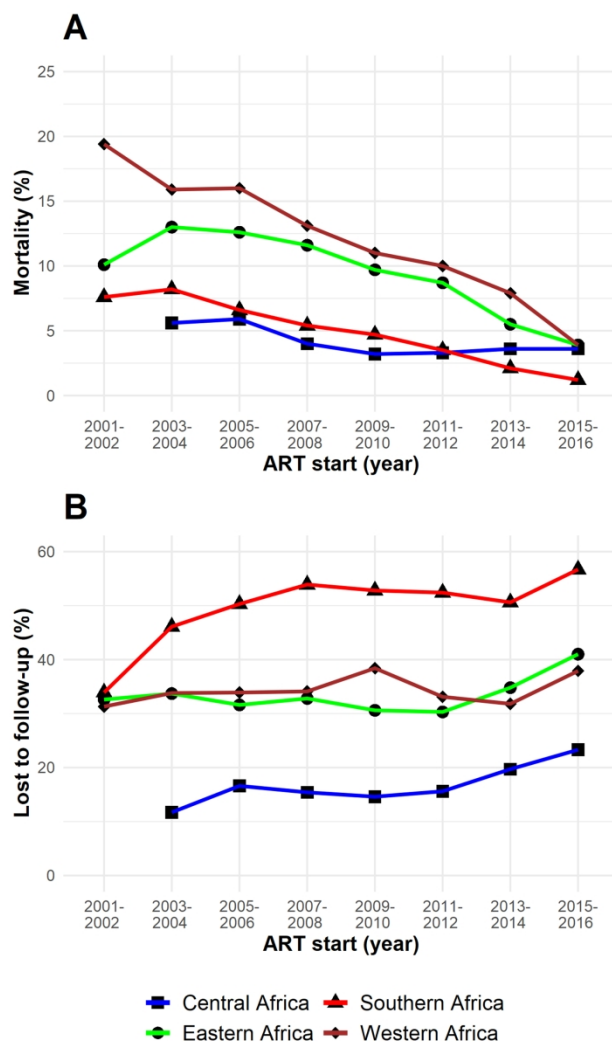

Figure 3. Trends in mortality (A) and loss to follow (B), 2001 to 2016.

# BMJ Open

## Cohort profile: The International epidemiology Databases to Evaluate AIDS (IeDEA) in sub-Saharan Africa, 2012-2019

|                                 |                                                                                                                                                                                                                                                                                                                                                                                                                                                                                                                                                                                                                                                                                                                                                                                                                                                                                                                                                                                                                                                                                                                                                                                                                                                                                                                                                                                                                                                                                                                                                                                                            |
|---------------------------------|------------------------------------------------------------------------------------------------------------------------------------------------------------------------------------------------------------------------------------------------------------------------------------------------------------------------------------------------------------------------------------------------------------------------------------------------------------------------------------------------------------------------------------------------------------------------------------------------------------------------------------------------------------------------------------------------------------------------------------------------------------------------------------------------------------------------------------------------------------------------------------------------------------------------------------------------------------------------------------------------------------------------------------------------------------------------------------------------------------------------------------------------------------------------------------------------------------------------------------------------------------------------------------------------------------------------------------------------------------------------------------------------------------------------------------------------------------------------------------------------------------------------------------------------------------------------------------------------------------|
| Journal:                        | <i>BMJ Open</i>                                                                                                                                                                                                                                                                                                                                                                                                                                                                                                                                                                                                                                                                                                                                                                                                                                                                                                                                                                                                                                                                                                                                                                                                                                                                                                                                                                                                                                                                                                                                                                                            |
| Manuscript ID                   | bmjopen-2019-035246.R1                                                                                                                                                                                                                                                                                                                                                                                                                                                                                                                                                                                                                                                                                                                                                                                                                                                                                                                                                                                                                                                                                                                                                                                                                                                                                                                                                                                                                                                                                                                                                                                     |
| Article Type:                   | Cohort profile                                                                                                                                                                                                                                                                                                                                                                                                                                                                                                                                                                                                                                                                                                                                                                                                                                                                                                                                                                                                                                                                                                                                                                                                                                                                                                                                                                                                                                                                                                                                                                                             |
| Date Submitted by the Author:   | 21-Feb-2020                                                                                                                                                                                                                                                                                                                                                                                                                                                                                                                                                                                                                                                                                                                                                                                                                                                                                                                                                                                                                                                                                                                                                                                                                                                                                                                                                                                                                                                                                                                                                                                                |
| Complete List of Authors:       | Chammartin, Frédérique; University of Bern, Institute of Social & Preventive Medicine<br>Dao Ostinelli, Cam Ha; University of Bern, Institute of Social & Preventive Medicine<br>Anastos, Kathryn; Yeshiva University Albert Einstein College of Medicine, Department of Medicine<br>Jaquet, Antoine; University of Bordeaux, ISPED, Centre INSERM U1219 – Bordeaux Population Health<br>Brazier, Ellen ; City University of New York, Institute for Implementation Science in Population Health; City University of New York, Graduate School of Public Health and Health Policy<br>Brown, Steven; Indiana University Richard M Fairbanks School of Public Health, Department of Biostatistics<br>DABIS, FRANCOIS; University of Bordeaux, ISPED, Centre INSERM U1219 – Bordeaux Population Health<br>Davies, Mary-Ann; University of Cape Town, Centre for Infectious Disease Epidemiology and Research, School of Public Health and Family Medicine<br>Duda, Stephany N; Vanderbilt University School of Medicine, Department of Biomedical Informatics<br>Malateste, Karen; University of Bordeaux, ISPED, Centre INSERM U1219 – Bordeaux Population Health<br>Nash, Denis; City University of New York, Institute for Implementation Science in Population Health; City University of New York, Graduate School of Public Health and Health Policy<br>Wools-Kaloustian, Kara; Indiana University System, Department of Medicine<br>von Groote, Per M; University of Bern, Institute of Social & Preventive Medicine<br>Egger, Matthias; University of Bern, Institute of Social & Preventive Medicine |
| <b>Primary Subject Heading</b>: | HIV/AIDS                                                                                                                                                                                                                                                                                                                                                                                                                                                                                                                                                                                                                                                                                                                                                                                                                                                                                                                                                                                                                                                                                                                                                                                                                                                                                                                                                                                                                                                                                                                                                                                                   |
| Secondary Subject Heading:      | Epidemiology, Global health, Health services research, Infectious diseases                                                                                                                                                                                                                                                                                                                                                                                                                                                                                                                                                                                                                                                                                                                                                                                                                                                                                                                                                                                                                                                                                                                                                                                                                                                                                                                                                                                                                                                                                                                                 |
| Keywords:                       | HIV & AIDS < INFECTIOUS DISEASES, EPIDEMIOLOGY, INFECTIOUS DISEASES, Tuberculosis < INFECTIOUS DISEASES                                                                                                                                                                                                                                                                                                                                                                                                                                                                                                                                                                                                                                                                                                                                                                                                                                                                                                                                                                                                                                                                                                                                                                                                                                                                                                                                                                                                                                                                                                    |

1  
2  
3  
4  
5  
6  
7  
8  
9  
10  
11  
12  
13  
14  
15  
16  
17  
18  
19  
20  
21  
22  
23  
24  
25  
26  
27  
28  
29  
30  
31  
32  
33  
34  
35  
36  
37  
38  
39  
40  
41  
42  
43  
44  
45  
46  
47  
48  
49  
50  
51  
52  
53  
54  
55  
56  
57  
58  
59  
60

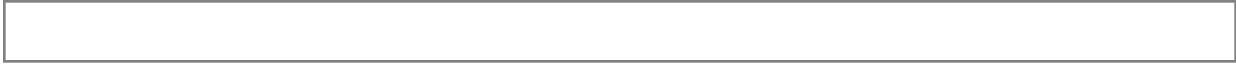

SCHOLARONE™  
Manuscripts



I, the Submitting Author has the right to grant and does grant on behalf of all authors of the Work (as defined in the below author licence), an exclusive licence and/or a non-exclusive licence for contributions from authors who are: i) UK Crown employees; ii) where BMJ has agreed a CC-BY licence shall apply, and/or iii) in accordance with the terms applicable for US Federal Government officers or employees acting as part of their official duties; on a worldwide, perpetual, irrevocable, royalty-free basis to BMJ Publishing Group Ltd ("BMJ") its licensees and where the relevant Journal is co-owned by BMJ to the co-owners of the Journal, to publish the Work in this journal and any other BMJ products and to exploit all rights, as set out in our [licence](#).

The Submitting Author accepts and understands that any supply made under these terms is made by BMJ to the Submitting Author unless you are acting as an employee on behalf of your employer or a postgraduate student of an affiliated institution which is paying any applicable article publishing charge ("APC") for Open Access articles. Where the Submitting Author wishes to make the Work available on an Open Access basis (and intends to pay the relevant APC), the terms of reuse of such Open Access shall be governed by a Creative Commons licence – details of these licences and which [Creative Commons](#) licence will apply to this Work are set out in our licence referred to above.

Other than as permitted in any relevant BMJ Author's Self Archiving Policies, I confirm this Work has not been accepted for publication elsewhere, is not being considered for publication elsewhere and does not duplicate material already published. I confirm all authors consent to publication of this Work and authorise the granting of this licence.

Revision 1 for BMJ Open

# Cohort profile: The International epidemiology Databases to Evaluate AIDS (IeDEA) in sub-Saharan Africa, 2012-2019

Frédérique Chammartin<sup>1</sup>, Cam Ha Dao Ostinelli<sup>1</sup>, Kathryn Anastos<sup>2</sup>, Antoine Jaquet,<sup>3</sup> Ellen Brazier<sup>4,5</sup>, Steven Brown<sup>6</sup>, François Dabis<sup>3</sup>, Mary-Ann Davies<sup>7</sup>, Stephany N Duda<sup>8</sup>, Karen Malateste<sup>3</sup>, Denis Nash<sup>4,5</sup>, Kara K Wools-Kaloustian<sup>9</sup>, Per M von Groote<sup>1</sup>, Matthias Egger<sup>1,7</sup>

<sup>1</sup> Institute of Social and Preventive Medicine, University of Bern, Bern, Switzerland

<sup>2</sup> Department of Medicine, Albert Einstein College of Medicine, Bronx, NY, USA

<sup>3</sup> Université Bordeaux, ISPED, Centre INSERM U1219 – Bordeaux Population Health, Bordeaux, France

<sup>4</sup> Institute for Implementation Science in Population Health, City University of New York, NY, USA

<sup>5</sup> Graduate School of Public Health and Health Policy, City University of New York, NY, USA

<sup>6</sup> Department of Biostatistics, Indiana University Fairbanks School of Public Health, Indianapolis, IN, United States

<sup>7</sup> Centre for Infectious Disease Epidemiology and Research, School of Public Health and Family Medicine, University of Cape Town, South Africa

<sup>8</sup> Department of Biomedical Informatics, Vanderbilt School of Medicine, Nashville, TN, USA

<sup>9</sup> Department of Medicine, Indiana University School of Medicine, Indianapolis, IN, United States

## Correspondence to:

Professor Matthias Egger  
Institute of Social and Preventive Medicine (ISPM)  
University of Bern  
Mittelstrasse 43  
CH-3012 Bern  
Switzerland  
matthias.egger@ispm.unibe.ch

Abstract 293 words, main text 2426 words, 2 tables, 3 figures, 1 Box with strengths and weaknesses (176 words), further details (424 words), 69 references



## ABSTRACT

**Purpose:** The objectives of the International epidemiology Databases to Evaluate AIDS (IeDEA) are to (i) evaluate the delivery of combination antiretroviral therapy (ART) in children, adolescents and adults in sub-Saharan Africa, (ii) to describe ART regimen effectiveness, durability and tolerability, (iii) to examine HIV-related comorbidities and co-infections, and (iv) to examine the pregnancy- and HIV-related outcomes of women on ART and their infants exposed to HIV or antiretroviral therapy in utero or via breastmilk.

**Participants:** IeDEA is organized in four regions (Central, East, Southern and West Africa), with 240 treatment and care sites, six data centres at African, European and US universities, and almost 1.4 million children, adolescents and adult people living with HIV (PLWHIV) enrolled.

**Findings to date:** The data include socio-demographic characteristics, clinical outcomes, opportunistic events, treatment regimens, clinic visits and laboratory measurements. They have been used to analyse outcomes in people living with HIV-1 or HIV-2 who initiate ART, including determinants of mortality, of switching to second-line and third-line ART, drug resistance, loss to follow-up and the immunological and virological response to different ART regimens. Programme-level estimates of mortality have been corrected for loss to follow-up. We examined the impact of co-infection with hepatitis B and C, and the epidemiology of different cancers and of (multi-drug resistant) tuberculosis, renal disease and of mental illness. The adoption of “Treat All”, making ART available to all PLWHIV regardless of CD4<sup>+</sup> cell count or clinical stage was another important research topic.

**Future plans:** IeDEA has formulated several research priorities for the “Treat All” era in sub-Saharan Africa. It recently obtained funding to set up sentinel sites where additional data are prospectively collected on cardiometabolic risks factors as well as mental health and liver diseases, and is planning to create a drug resistance database.

## Strengths and limitations of this study

- An important strength of the leDEA cohort collaboration in sub-Saharan Africa is its large size, which allows analyses of outcomes of antiretroviral therapy (ART) in children, adolescents and pregnant and postpartum women, across diverse settings.
- The data reflect routine care across a wide range of real-world settings during the scale up of ART in sub-Saharan Africa and thus provide a valuable platform to conduct operational and clinical research and to study temporal trends and the impact of changes in guidelines and other interventions.
- The development of a standardised Data Exchange Standard protocol has contributed to increase data quality, and data have been enriched by linkage to cancer registries, vital registries and administrative databases.
- Collaborations with the World Health Organization, UNAIDS, the mathematical modelling community and other consortia have ensured that the analyses of the African leDEA regions contributed to global health policy and decision making.
- Weaknesses include the limitations inherent in secondary use of routine clinical care data, with missing data, the lack of standardised follow-up visits, and substantial loss to follow-up resulting in unknown outcome.

## INTRODUCTION

The roll-out of combination antiretroviral therapy (ART) in sub-Saharan Africa from 2004 onwards has substantially improved the prognosis of HIV-1 infection, with a decline in AIDS-related deaths [1] and a decline in the incidence of new HIV-1 infections [2]. However, in many settings HIV/AIDS is still a public health threat. An estimated 1.8 million new infections occurred in 2017 and almost a million adult and child deaths were due to HIV, most of them in sub-Saharan Africa [2].

The World Health Organization (WHO), the Joint United Nations Programme on HIV/AIDS (UNAIDS) and many of the countries most heavily affected by the HIV epidemic have committed to ending HIV/AIDS as a major public health problem by 2030.[1] Targets to be reached by 2020 include that 90% of people living with HIV (PLWHIV) be aware of their status, 90% of those diagnosed initiate ART, and 90% of those on ART achieve undetectable viral loads (the 90-90-90 targets) [3]. Progress towards these goals has been more substantial in Eastern and Southern Africa than in West and Central Africa. Of the 20.6 million PLWHIV in Eastern and Southern Africa, an estimated 58% were virally suppressed, compared to 39% of 5.0 million in West and Central Africa [4].

Established more than ten years ago by the National Institutes of Health (NIH), the International epidemiology Databases to Evaluate AIDS (IeDEA) are a global cohort collaboration that collects HIV/AIDS data from HIV care and treatment programs, including in sub-Saharan Africa. The regional IeDEA data centres consolidate, curate and analyse data to evaluate the outcomes of people living with HIV/AIDS and monitor progress. The first years of the cohorts in sub-Saharan Africa were described previously [5]; here we provide an update on methods, key data and future plans.

## COHORT DESCRIPTION

In 2006 the National Institute of Allergy and Infectious Diseases (NIAID) sought applications for a global consortium structured through regional centres to pool clinical and epidemiological data on PLWHIV, in order to address questions that could not be answered by individual cohorts [5]. IeDEA covers seven geographic regions, namely North America, the Caribbean and Central/South America, the Asia-Pacific and four regions in sub-Saharan Africa: West Africa, Central Africa, East Africa and Southern

1  
2  
3 Africa. The project was initially funded for a 5-year period and has since been extended  
4 twice, with the current funding cycle ending in 2021.  
5

### 6 7 ***Settings and number of PLWHIV enrolled*** 8

9  
10 To date, the African regions of IeDEA received data from 240 HIV care and treatment  
11 facilities in 19 sub-Saharan African countries ([Figure 1A](#)). Close to 1,400,000 PLWHIV  
12 who initiated ART in sub-Saharan Africa are included ([Figure 1B](#)), of whom over 680,000  
13 are currently in care. In East and Southern Africa, both urban and rural facilities are well  
14 represented, while in Central and West Africa, urban facilities dominate. Facilities are  
15 predominately public (94%) and operated at the primary or secondary care level, with  
16 the exception of West Africa where 70% of facilities are at the tertiary level of care ([Table](#)  
17 [1](#)).  
18  
19  
20  
21  
22

### 23 24 ***Data collection at individual and site level*** 25

26 Since its inception, IeDEA has collected routine clinical data of PLWHIV followed under  
27 treatment, which includes socio-demographic characteristics, clinical outcomes,  
28 opportunistic events, treatment regimens, clinic visits and laboratory measurements. More  
29 recently, the IeDEA network has developed a Data Exchange Standard (DES) protocol  
30 (see [www.iedeades.org](http://www.iedeades.org)) with 25 data tables, which include a total of 228 unique variables  
31 (36 compulsory and 192 additional variables) and within-region unique patient research  
32 identifiers. Standardized data collection is supported by eight codebooks, including the  
33 Anatomical Therapeutic Chemical (ATC) classification for drugs and lists with codes for  
34 reasons for stopping treatment, for dropping out of the cohort, for mode of HIV infection,  
35 country, type and site of comorbidities, laboratory measurements and units of  
36 measurements and type of viral load assay. The collection, management and sharing of  
37 data is facilitated by the Harmonist toolkit, a software and standards package that supports  
38 research projects through the Research Electronic Data Capture (REDCap) system [6].  
39  
40  
41  
42  
43  
44  
45  
46  
47  
48

49 In recent years, site assessments and site surveys have been conducted on a regular  
50 basis to collect up-to-date information related to available clinical service and care models  
51 in the participating facilities. For example, a study compared the characteristics and  
52 comprehensiveness of adult HIV care and treatment programmes in sub-Saharan Africa  
53 with programmes in the Americas and Asia-Pacific region [7]. Other studies examined the  
54  
55  
56  
57  
58  
59  
60

1  
2  
3 management of mental health and substance use disorders [8], or the diagnostic and  
4 screening practices for (drug resistant) tuberculosis in adult and paediatric patients [9–  
5 11]. Furthermore, the routine data collected by participating sites have been enriched in  
6 some countries by linking the HIV databases to cancer registries [12,13], vital registries  
7 [14] or administrative databases [15].  
8  
9

### 10 11 12 ***Trends in CD4 cell count and viral load measurements*** 13

14  
15 While WHO continues to recommend a CD4 cell count before starting ART to inform the  
16 management of advanced disease and differentiated care in the Treat All era, it also  
17 recommends that CD4 testing be replaced by viral load measurement for monitoring of  
18 treatment and identification of treatment failure [16]. Figure 2 shows that in Southern and  
19 West Africa, the number of CD4 measurements tended to be stable over time, despite an  
20 increasing number of PLWHIV in care, while in East and Central Africa the number of CD4  
21 measurements dropped. At present, 53% of the active facilities reported routine CD4  
22 testing and 62% routine viral load testing (Table 1). The United States President's  
23 Emergency Plan for AIDS Relief (PEPFAR), which provides substantial funding for AIDS  
24 treatment, care and prevention in countries most affected by the epidemic, has  
25 progressively reduced its support for CD4 testing [17].  
26  
27  
28  
29  
30  
31  
32  
33

### 34 35 ***Trends in antiretroviral therapy*** 36

37 Until recently, the recommended first-line ART regimen in sub-Saharan Africa consisted  
38 of two nucleoside reverse transcriptase inhibitors and one non-nucleoside reverse  
39 transcriptase inhibitor (2NRTIs+1NNRTI). The combination of tenofovir (TDF), lamivudine  
40 (3TC) (or emtricitabine (FTC)) and efavirenz (EFV) is the current treatment of choice. The  
41 phasing out of stavudine (D4T) and nevirapine (NVP) was almost complete in 2014 (Table  
42 2). East Africa and Southern Africa are currently rolling out dolutegravir (DTG), an  
43 integrase inhibitor with a high barrier to resistance [18][19]. Due to concerns about an  
44 increased risk of neural tube defects if taken during pregnancy [20], the roll-out to women  
45 has been delayed or limited in some settings. Of note, drug stock-outs in the last 12  
46 months were reported by 59 facilities for first-line drugs, and by 45 for second-line drugs  
47 (Table 1).  
48  
49  
50  
51  
52  
53  
54  
55  
56  
57  
58  
59  
60

### ***Mortality and retention in care***

In cohorts of PLWHIV who initiated ART in consecutive two-year periods from 2001 to 2016, mortality at 3 years declined substantially in all African leDEA regions (Figure 3A). Loss to follow-up, defined as more than 90 days late to the next scheduled visit, remained substantial in all regions, and particularly high in Southern Africa (Figure 3B). Retention in care is key to the success of the public health approach to ART. Loss to follow-up has been an important issue for leDEA, and activities to trace PLWHIV not returning to the clinic have increased in recent years. At present, tracing of PLWHIV on ART who were lost to follow-up is in place in 89% of the active facilities; 75% have implemented it routinely (Table 1). Tracing methods vary widely across facilities and include phone calls and home visits by clinic staff or community health workers.

### ***Patient and public involvement***

leDEA is based on the collection of routine clinical data and no patients were involved in developing the research question, outcome measures and overall design of the collaboration. Due to the anonymous nature of the data, we cannot disseminate the results of analyses of the data directly to study participants.

## **FINDINGS TO DATE**

Over 500 publications in MEDLINE acknowledge funding from a core grant from the NIH to one or several African leDEA regions, and these publications have been cited over 10,000 times. Multiregional projects are developed in leDEA working groups, which currently address eight clinical areas: (i) cancer, (ii) ART outcomes, (iii) hepatitis, (iv) mental health, (v) mother-infant and paediatrics, (vi) renal disease, (vii) substance use and (viii) tuberculosis. Multiregional research concepts are discussed in the Executive Committee of leDEA, revised and approved or rejected. In recent years, several analyses were done in collaboration with WHO or UNAIDS [21–23]. The number of publications reporting multi-regional analyses from several African leDEA regions increased over time, from one such publication in 2007 to 24 multiregional publications in 2018. Some of the key studies are summarised below, with a focus on more recent and on multiregional analyses.

1  
2  
3 **Treatment outcomes in adults, adolescents, children and pregnant women:** Several  
4 studies examined outcomes in people living with HIV-1 or HIV-2 who initiate ART,  
5 including determinants of mortality, of switching to second-line and third-line ART, drug  
6 resistance, loss to follow-up and the immunological and virological response to different  
7 ART regimens [24–37]. For example, the African leDEA regions contributed importantly  
8 to a large-scale analysis of outcomes in adolescents living with perinatally acquired HIV,  
9 which showed that HIV-associated mortality during adolescence was substantially higher  
10 in sub-Saharan Africa, South and Southeast Asia, and South America and the Caribbean  
11 than in Europe [36]. A similar analysis of adolescents living with HIV showed that mortality  
12 and loss to follow-up were worse among those entering care at 15 years or older [37]. The  
13 authors concluded that adolescents must be evaluated separately from younger children  
14 and adults to identify population-specific reasons for death and loss to follow-up [37].  
15  
16  
17  
18  
19  
20  
21  
22  
23

24 **Programme-level mortality:** It became clear early on during the scale-up of ART in sub-  
25 Saharan Africa, that loss to follow-up of patients initiating ART was substantial [38], and  
26 that mortality among patients lost was higher than among patients remaining in care [39].  
27 Ignoring loss to follow-up might thus bias programme-level estimates of mortality, and  
28 much effort has gone into correcting programme-level mortality for loss to follow-up [40–  
29 46]. For example, an analysis of all four African regions showed that when analysing the  
30 uncorrected data observed in the clinics, 52% of adults and children were retained on  
31 ART, 42% were lost to follow-up and 6% had died 5 years after ART initiation [46]. After  
32 accounting for undocumented deaths and self-transfers, an estimated 67% of patients  
33 were retained on ART, 19% had stopped ART and 15% had died [46].  
34  
35  
36  
37  
38  
39  
40  
41

42 **Co-infections and co-morbidities:** leDEA investigators have examined the prevalence  
43 and impact of co-infection with hepatitis B and C, and the epidemiology of different  
44 cancers and of (multi-drug resistant) tuberculosis, renal disease and of mental illness  
45 [8,47–58]. For example, an analysis of leDEA data and data from the Collaboration of  
46 Observational HIV Epidemiological Research in Europe (COHERE) [59] showed that  
47 children living with HIV from sub-Saharan Africa, but not those from Europe or Asia had a  
48 high risk of developing Kaposi sarcoma after starting ART [58]. Similarly, a recent analysis  
49 of leDEA and COHERE data showed that compared to European women, rates of cervical  
50 cancer were 11 times higher in South Africa [50]. A recent multiregional study of multi-  
51  
52  
53  
54  
55  
56  
57  
58  
59  
60



1  
2  
3 drug resistant tuberculosis included HIV positive and HIV negative adults with tuberculosis  
4 from seven high-burden countries (Côte d'Ivoire, Democratic Republic of the Congo,  
5 Kenya, Nigeria, South Africa, Peru, and Thailand). Molecular or phenotypic drug  
6 susceptibility testing was done locally and at a reference laboratory. The results showed  
7 that inaccurate local drug susceptibility testing led to under-treatment of drug-resistant  
8 tuberculosis and increased mortality [54].  
9

10  
11  
12  
13  
14 **The challenge of “Treat All”:** Nearly all countries in sub-Saharan Africa have now  
15 adopted national policies to offer ART to all PLWHIV regardless of CD4 cell count or  
16 clinical stage (‘Treat All’), in order to meet the UNAIDS 90-90-90 targets. In 2011, Malawi  
17 was one of the first countries to implement such a strategy for the prevention of mother-  
18 to-child transmission (PMTCT), recommending ART for pregnant and breastfeeding  
19 women living with HIV, regardless of CD4 cell count or WHO clinical stage (“Option B+”).  
20 An leDEA analysis of the Malawian experience showed that poor retention in care was a  
21 problem in many facilities, with early loss to follow-up particularly high in facilities with a  
22 high patient volume and in patients who start ART during pregnancy on the day of HIV  
23 diagnosis [35]. More recently, leDEA investigators used regression discontinuity analysis  
24 to examine changes in rapid HIV treatment initiation after national “Treat All” policy  
25 adoption in six countries (Burundi, Kenya, Malawi, Rwanda, Uganda, Zambia) [60]. They  
26 showed a strong and sustained effect of the adoption of “Treat All” policies on ART  
27 initiation within 30 days of enrollment in HIV care in all six countries [60].  
28  
29  
30  
31  
32  
33  
34  
35  
36  
37  
38

39 **Future plans:** At the end of 2018, leDEA published a consensus statement [61] and a  
40 journal supplement [62] on research priorities to inform the implementation of the “Treat  
41 All” policy in children and adolescents [63], pregnant and post-partum women [64], and  
42 for mental health, substance use [65] and drug resistance [66]. These documents will  
43 guide leDEA’s future research agenda in sub-Saharan Africa. Furthermore, the creation  
44 of an leDEA Sentinel Research Network (leDEA-SRN) will facilitate the collection of  
45 detailed data in selected leDEA sites on cardio-metabolic risk factors (e.g. hypertension,  
46 diabetes, dyslipidaemia) liver disease (liver fibrosis and steatosis) , mental health and  
47 substance use. In the East and Southern African regions, pharmacovigilance in  
48 pregnancy is being developed to assess the impact of ART on birth outcomes. A project  
49 involving all four African regions studies the cascade of screening for cervical cancer,  
50  
51  
52  
53  
54  
55  
56  
57  
58  
59  
60



1  
2  
3 while the establishment of the South African HIV Cancer Match (SAM) study of over ten  
4 million PLWHIV, from linkage of national laboratory with cancer registry data, will allow  
5 the study of less common cancers. Finally, the creation of a drug resistance database as  
6 a central repository for resistance tests performed in routine clinical care is another  
7 planned addition.  
8  
9  
10  
11

## 12 **COLLABORATIONS**

13  
14  
15 The African regions of leDEA have collaborated and continue to encourage collaborations  
16 with other consortia, cohort collaborations, the HIV modelling community and public health  
17 agencies as well as individuals wishing to use leDEA data. Examples include work with  
18 COHERE [50,58,67,68], the Collaborative Initiative for Paediatric HIV Education and  
19 Research (CIPHER) [36,69] or the Measurement & Surveillance of HIV Epidemics (MeSH)  
20 consortium [22] as well as UNAIDS [22,23] and WHO [21]. Further collaborations are  
21 welcome. Investigators wishing to work with the leDEA data should contact the teams at  
22 the regional data centres (see [www.iedea.org](http://www.iedea.org) for contact details) and send a concept  
23 sheet for the analyses they are interested in performing and the variables that would be  
24 required. Anyone wishing to work with leDEA must sign a data-use agreement.  
25  
26  
27  
28  
29  
30  
31  
32  
33  
34  
35  
36  
37  
38  
39  
40  
41  
42  
43  
44  
45  
46  
47  
48  
49  
50  
51  
52  
53  
54  
55  
56  
57  
58  
59  
60

## FURTHER DETAILS

*Acknowledgements:* The authors wish to thank the clinical and administrative staff at the participating clinics. We are grateful to all PLWHIV who contributed to the leDEA database.

*Contributors:* FC, PMG, and ME conceptualised the study. FC and CHDO performed statistical analyses. FC and ME wrote the first draft of the paper. CHDO, KA, AJ, EB, SB, FD, MAD, SND, KM, BSM, DN, KWK, CY, PMG and ME contributed to interpreting the data and to the writing and revising of the manuscript.

*Funding:* The International Epidemiology Databases to Evaluate AIDS (leDEA) is supported by the U.S. National Institutes of Health's National Institute of Allergy and Infectious Diseases, the Eunice Kennedy Shriver National Institute of Child Health and Human Development, the National Cancer Institute, the National Institute of Mental Health, the National Institute on Drug Abuse and Alcoholism, the National Institute of Diabetes and Digestive and Kidney Diseases, the Fogarty International Center, the National Library of Medicine, and the Office of the Director: Central Africa, U01AI096299; East Africa, U01AI069911; Southern Africa, U01AI069924; West Africa, U01AI069919. Informatics resources are supported by the Harmonist project, R24AI124872. ME was supported by special project funding (Grant No. 174281) from the Swiss National Science Foundation.

*Disclaimer:* The contents are the responsibility of the authors and do not necessarily reflect the views of NIAD or the US Government. The funders had no role in study design, data collection and analysis, decision to publish or preparation of the manuscript.

*Competing interests:* None declared.

*Ethics approval:* The Ethics Committee of the Canton of Bern, the Ethics Committee of the University of Cape Town and the local ethics committees or institutional review boards all approved the use of routine clinical data for research within the leDEA collaboration. For studies requiring additional data collection, separate ethics approval and study-specific informed consent is sought.

1  
2  
3 *Provenance and peer review:* Not commissioned; externally peer reviewed.  
4

5  
6 *Data sharing statement:* Investigators wishing to work with leDEA data should contact  
7 the regional data centres (see [www.iedea.org](http://www.iedea.org)) and send a concept sheet for the  
8 analyses they are interested in performing and the variables that would be required. See  
9 [www.iedeades.org](http://www.iedeades.org) for list of variables. Those wishing to work with the data must sign a  
10 data-use agreement.  
11  
12  
13

14  
15 *Open Access:* This is an Open Access article distributed in accordance with the Creative  
16 Commons Attribution Non Commercial (CC BY-NC 4.0) license, which permits others to  
17 distribute, remix, adapt, build upon this work non-commercially, and license their  
18 derivative works on different terms, provided the original work is properly cited and the  
19 use is non-commercial. See: <http://creativecommons.org/licenses/by-nc/4.0/>.  
20  
21  
22  
23  
24  
25  
26  
27  
28  
29  
30  
31  
32  
33  
34  
35  
36  
37  
38  
39  
40  
41  
42  
43  
44  
45  
46  
47  
48  
49  
50  
51  
52  
53  
54  
55  
56  
57  
58  
59  
60

## REFERENCES

- 1 UNAIDS. Global AIDS update 2016. Geneva, Switzerland: 2016.
- 2 UNAIDS. UNAIDS Data 2018. UNAIDS <https://www.aidsdatahub.org/unaids-data-2018-unaids-2018>
- 3 UNAIDS. 90-90-90: An ambitious treatment target to help end the AIDS epidemic. Geneva, Switzerland: 2014.
- 4 UNAIDS. UNAIDS data 2019. <https://www.unaids.org/en/resources/documents/2019/2019-UNAIDS-data> (accessed 16 Jan 2020).
- 5 Egger M, Ekouevi DK, Williams C, *et al.* Cohort Profile: The international epidemiological databases to evaluate AIDS (IeDEA) in sub-Saharan Africa. *Int J Epidemiol* 2012;**41**:1256–64. doi:10.1093/ije/dyr080
- 6 Harris PA, Taylor R, Minor BL, *et al.* The REDCap consortium: Building an international community of software platform partners. *J Biomed Inform* 2019;**95**:103208. doi:10.1016/j.jbi.2019.103208
- 7 Duda SNSN, Farr AMAM, Lindegren MLML, *et al.* Characteristics and comprehensiveness of adult HIV care and treatment programmes in Asia-Pacific, sub-Saharan Africa and the Americas: results of a site assessment conducted by the International epidemiologic Databases to Evaluate AIDS Collaboration. *J Int AIDS Soc* 2014;**17**:19045. doi:10.7448/IAS.17.1.19045
- 8 Parcesepe AM, Mugglin C, Nalugoda F, *et al.* Screening and management of mental health and substance use disorders in HIV treatment settings in low- and middle-income countries within the global IeDEA consortium. *J Int AIDS Soc* 2018;**21**:e25101. doi:10.1002/jia2.25101
- 9 Ballif M, Nhandu V, Wood R, *et al.* Detection and management of drug-resistant tuberculosis in HIV-infected patients in lower-income countries. *Int J Tuberc Lung Dis Off J Int Union Tuberc Lung Dis* 2014;**18**:1327–36. doi:10.5588/ijtld.14.0106
- 10 Fenner L, Forster M, Boulle A, *et al.* Tuberculosis in HIV programmes in lower-income countries: practices and risk factors. *Int J Tuberc Lung Dis Off J Int Union Tuberc Lung Dis* 2011;**15**:620–7. doi:10.5588/ijtld.10.0249
- 11 Ballif M, Renner L, Claude Dusingize J, *et al.* Tuberculosis in Pediatric Antiretroviral Therapy Programs in Low- and Middle-Income Countries: Diagnosis and Screening Practices. *J Pediatr Infect Dis Soc* 2015;**4**:30–8. doi:10.1093/jpids/piu020
- 12 Horner M-J, Chasimpha S, Spoerri A, *et al.* High Cancer Burden Among Antiretroviral Therapy Users in Malawi: a Record Linkage Study of Observational HIV Cohorts and Cancer Registry Data. *Clin Infect Dis* Published Online First: 17 November 2018. doi:10.1093/cid/ciy960

- 1  
2  
3 13 Dhokotera T, Bohlius J, Spoerri A, *et al*. The burden of cancers associated with HIV in the  
4 South African public health sector, 2004-2014: a record linkage study. *Infect Agent Cancer*  
5 2019;**14**:12. doi:10.1186/s13027-019-0228-7  
6  
7  
8 14 Boulle A, Schomaker M, May MT, *et al*. Mortality in patients with HIV-1 infection starting  
9 antiretroviral therapy in South Africa, Europe, or North America: a collaborative analysis of  
10 prospective studies. *PLoS Med* 2014;**11**:e1001718. doi:10.1371/journal.pmed.1001718  
11  
12 15 Davies M-A, Tsondai P, Tiffin N, *et al*. Where do HIV-infected adolescents go after transfer?  
13 - Tracking transition/transfer of HIV-infected adolescents using linkage of cohort data to a  
14 health information system platform. *J Int AIDS Soc* 2017;**20**:21668.  
15 doi:10.7448/IAS.20.4.21668  
16  
17  
18 16 WHO. Consolidated guidelines on the use of antiretroviral drugs for treating and preventing  
19 HIV infection: recommendations for a public health approach. Geneva, Switzerland: 2013.  
20  
21 17 (PEPFAR). PEPFAR 2018 Country Operational Plan Guidance for Standard Process  
22 Countries Table of Contents. 2018.  
23  
24 18 Cottrell ML, Hadzic T, Kashuba ADM. Clinical Pharmacokinetic, Pharmacodynamic and  
25 Drug-Interaction Profile of the Integrase Inhibitor Dolutegravir. *Clin Pharmacokinet*  
26 2013;**52**:981–94. doi:10.1007/s40262-013-0093-2  
27  
28  
29 19 Mesplede T, Quashie PK, Osman N, *et al*. Viral fitness cost prevents HIV-1 from evading  
30 dolutegravir drug pressure. *Retrovirology* 2013;**10**:22. doi:10.1186/1742-4690-10-22  
31  
32 20 Zash R, Holmes L, Diseko M, *et al*. Neural-Tube Defects and Antiretroviral Treatment  
33 Regimens in Botswana. *N Engl J Med* 2019;:NEJMoa1905230.  
34 doi:10.1056/NEJMoa1905230  
35  
36  
37 21 Zaniewski E, Tymejczyk O, Kariminia A, *et al*. IeDEA-WHO Research-Policy  
38 Collaboration: contributing real-world evidence to HIV progress reporting and guideline  
39 development. *J Virus Erad* 2018;**4**:9–15.  
40  
41 22 Anderegg N, Johnson LF, Zaniewski E, *et al*. All-cause mortality in HIV-positive adults  
42 starting combination antiretroviral therapy: correcting for loss to follow-up. *AIDS Lond Engl*  
43 2017;**31 Suppl 1**:S31–40. doi:10.1097/QAD.0000000000001321  
44  
45 23 Mahy M, Penazzato M, Ciaranello A, *et al*. Improving estimates of children living with HIV  
46 from the Spectrum AIDS Impact Model. *AIDS Lond Engl* 2017;**31 Suppl 1**:S13–22.  
47 doi:10.1097/QAD.0000000000001306  
48  
49  
50 24 Davies M-AM-AA, May M, Bolton-Moore C, *et al*. Prognosis of Children With HIV-1  
51 Infection Starting Antiretroviral Therapy in Southern Africa. *Pediatr Infect Dis J*  
52 2014;**33**:608–16. doi:10.1097/INF.0000000000000214  
53  
54 25 Petersen ML, Tran L, Geng EH, *et al*. Delayed switch of antiretroviral therapy after virologic  
55 failure associated with elevated mortality among HIV-infected adults in Africa. *AIDS Lond*  
56 *Engl* 2014;**28**:2097–107. doi:10.1097/QAD.0000000000000349  
57  
58  
59

- 1  
2  
3 26 Tchounga BK, Hønge BL, Eholie SP, *et al.* Effect of sex and age on outcomes among HIV-2-  
4 infected patients starting antiretroviral therapy in West Africa. *AIDS Lond Engl*  
5 2016;**30**:2707–14. doi:10.1097/QAD.0000000000001232  
6  
7 27 Giles ML, Achhra AC, Abraham AG, *et al.* Sex-based differences in antiretroviral therapy  
8 initiation, switching and treatment interruptions: global overview from the International  
9 Epidemiologic Databases to Evaluate AIDS (IeDEA). *J Int AIDS Soc* 2018;**21**:e25149.  
10 doi:10.1002/jia2.25149  
11  
12 28 Haas AD, Keiser O, Balestre E, *et al.* Monitoring and switching of first-line antiretroviral  
13 therapy in adult treatment cohorts in sub-Saharan Africa: Collaborative analysis. *Lancet HIV*  
14 2015;**2**:e271–e278. doi:10.1016/S2352-3018(15)00087-9  
15  
16 29 Chimbetete C, Katzenstein D, Shamu T, *et al.* HIV-1 Drug Resistance and Third-Line  
17 Therapy Outcomes in Patients Failing Second-Line Therapy in Zimbabwe. *Open Forum*  
18 *Infect Dis* 2018;**5**:1–8. doi:10.1093/ofid/ofy005  
19  
20 30 Wools-Kaloustian K, Marete I, Ayaya S, *et al.* Time to First-Line ART Failure and Time to  
21 Second-Line ART Switch in the IeDEA Pediatric Cohort. *Jacids-J Acquir Immune Defic*  
22 *Syndr* 2018;**78**:221–30. doi:10.1097/QAI.0000000000001667  
23  
24 31 Charpentier C, Eholié S, Anglaret X, *et al.* Genotypic resistance profiles of HIV-2-treated  
25 patients in West Africa. *AIDS Lond Engl* 2014;**28**:1161–9.  
26 doi:10.1097/QAD.0000000000000244  
27  
28 32 Kiragga AN, Lok JJ, Musick BS, *et al.* CD4 trajectory adjusting for dropout among HIV-  
29 positive patients receiving combination antiretroviral therapy in an East African HIV care  
30 centre. *J Int AIDS Soc* 2014;**17**:18957. doi:10.7448/IAS.17.1.18957  
31  
32 33 Geng EH, Neilands TB, Thiébaut R, *et al.* CD41 T cell recovery during suppression of HIV  
33 replication: an international comparison of the immunological efficacy of antiretroviral  
34 therapy in North America, Asia and Africa. *Int J Epidemiol* 2015;**44**:251–63.  
35 doi:10.1093/ije/dyu271  
36  
37 34 Technau K-G, Schomaker M, Kuhn L, *et al.* Virologic response in children treated with  
38 abacavir-compared with stavudine-based antiretroviral treatment: a South African multi-  
39 cohort analysis. *Pediatr Infect Dis J* 2014;**33**:617–22. doi:10.1097/INF.0000000000000222  
40  
41 35 Tenthani L, Haas AD, Tweya H, *et al.* Retention in care under universal antiretroviral therapy  
42 for HIV-infected pregnant and breastfeeding women (‘Option B+’) in Malawi. *AIDS*  
43 2014;**28**:589–598 Keywords:  
44  
45 36 Collaborative Initiative for Paediatric HIV Education and Research (CIPHER) Global Cohort  
46 Collaboration, Slogrove AL, Schomaker M, *et al.* The epidemiology of adolescents living  
47 with perinatally acquired HIV: A cross-region global cohort analysis. *PLoS Med*  
48 2018;**15**:e1002514. doi:10.1371/journal.pmed.1002514  
49  
50  
51  
52  
53  
54  
55  
56  
57  
58  
59  
60



- 1  
2  
3 37 Kariminia A, Law M, Davies M, *et al*. Mortality and losses to follow-up among adolescents  
4 living with HIV in the Ie DEA global cohort collaboration. *J Int AIDS Soc* 2018;**21**:e25215.  
5 doi:10.1002/jia2.25215  
6  
7 38 Rosen S, Fox MP, Gill CJ. Patient retention in antiretroviral therapy programs in sub-Saharan  
8 Africa: a systematic review. *PLoS Med* 2007;**4**:e298.  
9  
10 39 Brinkhof MWGMMWG, Pujades-Rodriguez M, Egger M. Mortality of patients lost to  
11 follow-up in antiretroviral treatment programmes in resource-limited settings: systematic  
12 review and meta-analysis. *PLoS One* 2009;**4**:e5790. doi:10.1371/journal.pone.0005790  
13  
14 40 Geng EH, Odeny TA, Lyamuya RE, *et al*. Estimation of mortality among HIV-infected  
15 people on antiretroviral treatment in east Africa: a sampling based approach in an  
16 observational, multisite, cohort study. *Lancet HIV* 2015;**2**:e107–16. doi:10.1016/S2352-  
17 3018(15)00002-8  
18  
19 41 An M-W, Frangakis CE, Yiannoutsos CT. Choosing profile double-sampling designs for  
20 survival estimation with application to President’s Emergency Plan for AIDS Relief  
21 evaluation. *Stat Med* 2014;**33**:2017–29. doi:10.1002/sim.6087  
22  
23 42 Schomaker M, Gsponer T, Estill J, *et al*. Non-ignorable loss to follow-up: correcting  
24 mortality estimates based on additional outcome ascertainment. *Stat Med* 2014;**33**:129–142.  
25 doi:10.1002/sim.5912  
26  
27 43 Brinkhof MWG, Spycher BD, Yiannoutsos C, *et al*. Adjusting mortality for loss to follow-up:  
28 Analysis of five art programmes in sub-saharan africa. *PLoS ONE* 2010;**5**:3–8.  
29 doi:10.1371/journal.pone.0014149  
30  
31 44 Egger M, Spycher BD, Sidle J, *et al*. Correcting mortality for loss to follow-up: a nomogram  
32 applied to antiretroviral treatment programmes in sub-Saharan Africa. *PLoS Med*  
33 2011;**8**:e1000390. doi:10.1371/journal.pmed.1000390  
34  
35 45 Yiannoutsos CT, Johnson LF, Boulle A, *et al*. Estimated mortality of adult HIV-infected  
36 patients starting treatment with combination antiretroviral therapy. *Sex Transm Infect*  
37 2012;**88 Suppl 2**:i33—43.  
38  
39 46 Haas AD, Zaniewski E, Anderegg N, *et al*. Retention and mortality on antiretroviral therapy  
40 in sub-Saharan Africa: collaborative analyses of HIV treatment programmes. *J Int AIDS Soc*  
41 2018;**21**:e25084. doi:10.1002/jia2.25084  
42  
43 47 Hector J, Vinikoor M, Chilengi R, *et al*. No Impact of Hepatitis B Virus Infection on Early  
44 Mortality Among Human Immunodeficiency Virus–Infected Patients in Southern Africa.  
45 *Clin Infect Dis* 2018;**67**:1310–1311. doi:10.1093/cid/ciy304  
46  
47 48 Wandeler G, Mulenga L, Hobbins M, *et al*. Absence of Active Hepatitis C Virus Infection in  
48 Human Immunodeficiency Virus Clinics in Zambia and Mozambique. *Open Forum Infect*  
49 *Dis* 2016;**3**:ofw049. doi:10.1093/ofid/ofw049  
50  
51  
52  
53  
54  
55  
56  
57  
58  
59  
60

- 1  
2  
3 49 Jaquet A, Wandeler G, Nouaman M, *et al.* Alcohol use, viral hepatitis and liver fibrosis  
4 among HIV-positive persons in West Africa: A cross-sectional study. *J Int AIDS Soc*  
5 2017;**20**:21424. doi:10.7448/IAS.20.1.21424  
6  
7 50 Rohner E, Bütikofer L, Schmidlin K, *et al.* Cervical cancer risk in women living with HIV  
8 across four continents: A multicohort study: Regional cervical cancer risk in HIV-positive  
9 women. *Int J Cancer* Published Online First: 19 June 2019. doi:10.1002/ijc.32260  
10  
11 51 Brown SA, Abbas S, Davies M-A, *et al.* Brief Report: Pediatric Cancer Burden and  
12 Treatment Resources Within the Pediatric IeDEA Consortium. *J Acquir Immune Defic Syndr*  
13 1999 2017;**76**:60–4. doi:10.1097/QAI.0000000000001453  
14  
15 52 Semeere A, Wenger M, Busakhala N, *et al.* A prospective ascertainment of cancer incidence  
16 in sub-Saharan Africa: The case of Kaposi sarcoma. *Cancer Med* 2016;**5**:914–28.  
17 doi:10.1002/cam4.618  
18  
19 53 Carlucci JG, Blevins Peratikos M, Kipp AM, *et al.* Tuberculosis Treatment Outcomes  
20 Among HIV/TB-Coinfected Children in the International Epidemiology Databases to  
21 Evaluate AIDS (IeDEA) Network. *J Acquir Immune Defic Syndr 1999* 2017;**75**:156–63.  
22 doi:10.1097/QAI.0000000000001335  
23  
24 54 Zurcher K, Ballif M, Fenner L, *et al.* Drug susceptibility testing and mortality in patients  
25 treated for tuberculosis in high-burden countries: a multicentre cohort study. *Lancet Infect*  
26 *Dis* 2019;**19**:298–307. doi:10.1016/S1473-3099(18)30673-X  
27  
28 55 Gygli SM, Keller PM, Ballif M, *et al.* Whole-Genome Sequencing for Drug Resistance  
29 Profile Prediction in Mycobacterium tuberculosis. *Antimicrob Agents Chemother*  
30 2019;**63**:e02175-18. doi:10.1128/AAC.02175-18  
31  
32 56 Zürcher K, Ballif M, Kiertiburanakul S, *et al.* Diagnosis and clinical outcomes of  
33 extrapulmonary tuberculosis in antiretroviral therapy programmes in low- and middle-income  
34 countries: a multicohort study. *J Int AIDS Soc* 2019;**22**:e25392. doi:10.1002/jia2.25392  
35  
36 57 Mulenga L, Musonda P, Mwango A, *et al.* Effect of baseline renal function on tenofovir-  
37 containing antiretroviral therapy outcomes in Zambia. *Clin Infect Dis Off Publ Infect Dis Soc*  
38 *Am* 2014;**58**:1473–80. doi:10.1093/cid/ciu117  
39  
40 58 Rohner E, Schmidlin K, Zwahlen M, *et al.* Kaposi Sarcoma Risk in HIV-Infected Children  
41 and Adolescents on Combination Antiretroviral Therapy From Sub-Saharan Africa, Europe,  
42 and Asia. *Clin Infect Dis* 2016;**63**:ciw519. doi:10.1093/cid/ciw519  
43  
44 59 Chêne G, Phillips A, Costagliola D, *et al.* Cohort profile: Collaboration of Observational HIV  
45 Epidemiological Research Europe (COHERE) in EuroCoord. *Int J Epidemiol* 2017;**46**:797.  
46 doi:10.1093/ije/dyw211  
47  
48 60 Tymejczyk O, Brazier E, Yiannoutsos CT, *et al.* Changes in rapid HIV treatment initiation  
49 after national “treat all” policy adoption in 6 sub-Saharan African countries: Regression  
50 discontinuity analysis. *PLOS Med* 2019;**16**:e1002822. doi:10.1371/journal.pmed.1002822  
51  
52  
53  
54  
55  
56  
57  
58  
59  
60



- 1  
2  
3 61 Yotebieng M, Brazier E, Addison D, *et al*. Research priorities to inform “Treat All” policy  
4 implementation for people living with HIV in sub-Saharan Africa: a consensus statement  
5 from the International epidemiology Databases to Evaluate AIDS (Ie DEA ). *J Int AIDS Soc*  
6 2019;**22**:e25218. doi:10.1002/jia2.25218  
7  
8  
9 62 Nash D, Yotebieng M, Sohn AH. Treating all people living with HIV in sub-Saharan Africa:  
10 a new era calling for new approaches. *J Virus Erad* 2018;**4**:1–4.  
11  
12 63 Enane LA, Davies M-A, Leroy V, *et al*. Traversing the cascade: urgent research priorities for  
13 implementing the “treat all” strategy for children and adolescents living with HIV in sub-  
14 Saharan Africa. *J Virus Erad* 2018;**4**:40–46.  
15  
16 64 Abuogi LL, Humphrey JM, Mpody C, *et al*. Achieving UNAIDS 90-90-90 targets for  
17 pregnant and postpartum women in sub-Saharan Africa: progress, gaps and research needs. *J*  
18 *Virus Erad* 2018;**4**:33–9.  
19  
20  
21 65 Lancaster KE, Hetrick A, Jaquet A, *et al*. Substance use and universal access to HIV testing  
22 and treatment in sub-Saharan Africa: implications and research priorities. *J Virus Erad*  
23 2018;**4**:26–32.  
24  
25  
26 66 de Waal R, Lessells R, Hauser A, *et al*. HIV drug resistance in sub-Saharan Africa: public  
27 health questions and the potential role of real-world data and mathematical modelling. *J*  
28 *Virus Erad* 2018;**4**:55–8.  
29  
30 67 Panayidou K, Davies M-A, Anderegg N, *et al*. Global temporal changes in the proportion of  
31 children with advanced disease at the start of combination antiretroviral therapy in an era of  
32 changing criteria for treatment initiation. *J Int AIDS Soc* 2018;**21**:e25200.  
33 doi:10.1002/jia2.25200  
34  
35  
36 68 Anderegg N, Panayidou K, Abo Y, *et al*. Global Trends in CD4 Cell Count at the Start of  
37 Antiretroviral Therapy: Collaborative Study of Treatment Programs. *Clin Infect Dis*  
38 2018;**66**:893–903. doi:10.1093/cid/cix915  
39  
40 69 Collaborative Initiative for Paediatric HIV Education and Research (CIPHER) Global Cohort  
41 Collaboration. Incidence of switching to second-line antiretroviral therapy and associated  
42 factors in children with HIV: an international cohort collaboration. *Lancet HIV* 2019;**6**:e105–  
43 15. doi:10.1016/S2352-3018(18)30319-9  
44  
45  
46  
47  
48  
49  
50  
51  
52  
53  
54  
55  
56  
57  
58  
59  
60

**Table 1: Characteristics of 240 facilities providing ART in the African regions if the leDEA (source: site assessment survey 2017).**

|                                                             | West Africa | Central Africa | East Africa | Southern Africa | All regions (%) |
|-------------------------------------------------------------|-------------|----------------|-------------|-----------------|-----------------|
| <b>No of active facilities</b>                              | 17          | 19             | 72          | 132             | 240             |
| <b>No of patients on ART</b>                                | 45,015      | 32,754         | 252,266     | 1,066,591       | 1,396,626       |
| <b>Location</b>                                             |             |                |             |                 |                 |
| Urban                                                       | 17          | 19             | 19          | 65              | 120 (50)        |
| Rural                                                       | 0           | 0              | 52          | 67              | 119 (50)        |
| Missing                                                     | 0           | 0              | 1           | 0               | 1 (0)           |
| <b>Level of care</b>                                        |             |                |             |                 |                 |
| Primary                                                     | 4           | 12             | 49          | 107             | 172 (72)        |
| Secondary                                                   | 1           | 0              | 16          | 20              | 37 (15)         |
| Tertiary                                                    | 12          | 7              | 6           | 5               | 30 (13)         |
| Missing                                                     | 0           | 0              | 1           | 0               | 1 (0)           |
| <b>Type of facility</b>                                     |             |                |             |                 |                 |
| Public                                                      | 12          | 16             | 69          | 128             | 225 (94)        |
| Private                                                     | 2           | 3              | 3           | 4               | 12 (5)          |
| Missing                                                     | 3           | 0              | 0           | 0               | 3 (1)           |
| <b>Viral load</b>                                           |             |                |             |                 |                 |
| Routine testing                                             | 12          | 16             | 46          | 74              | 148 (62)        |
| Tests performed onsite                                      | 8           | 6              | 4           | 3               | 21 (9)          |
| Tests performed offsite                                     | 6           | 13             | 53          | 127             | 199 (83)        |
| <b>CD4 monitoring</b>                                       |             |                |             |                 |                 |
| Routine testing                                             | 14          | 6              | 9           | 97              | 126 (53)        |
| Tests performed onsite                                      | 11          | 8              | 23          | 51              | 93 (39)         |
| Tests performed offsite                                     | 3           | 11             | 35          | 71              | 120 (50)        |
| <b>HIV-1 genotypic drug resistance</b>                      |             |                |             |                 |                 |
| Routine testing                                             | 2           | 2              | 10          | 48              | 62 (26)         |
| <b>Routine tracing of patients LTFU</b>                     |             |                |             |                 |                 |
| Yes                                                         | 13          | 19             | 56          | 93              | 181 (75)        |
| No                                                          | 1           | 0              | 1           | 37              | 39 (16)         |
| Missing                                                     | 3           | 0              | 15          | 2               | 20 (8)          |
| <b>Tracing method*</b>                                      |             |                |             |                 |                 |
| Phone                                                       | 14          | 18             | 57          | 110             | 199 (83)        |
| SMS/mail/email                                              | 2           | 2              | 10          | 14              | 28 (15)         |
| Home visit                                                  | 9           | 17             | 52          | 129             | 207 (86)        |
| <b>Medication disruption/stock outs over last 12 months</b> |             |                |             |                 |                 |
| First-line ART                                              | 5           | 2              | 20          | 32              | 59 (25)         |
| Second-line ART                                             | 5           | 6              | 18          | 16              | 45 (19)         |

\*Sites may use more than 1 method.

**Table 2: Proportion of patients with different nucleoside and non-nucleoside reverse transcriptase inhibitor regimens at the start of first-line antiretroviral therapy, by time period and region.**

|                | Central Africa  |           |           |           |           |           |           |           | East Africa |           |           |           |           |           |           |           |
|----------------|-----------------|-----------|-----------|-----------|-----------|-----------|-----------|-----------|-------------|-----------|-----------|-----------|-----------|-----------|-----------|-----------|
|                | 2001-2002       | 2003-2004 | 2005-2006 | 2007-2008 | 2009-2010 | 2011-2012 | 2013-2014 | 2015-2016 | 2001-2002   | 2003-2004 | 2005-2006 | 2007-2008 | 2009-2010 | 2011-2012 | 2013-2014 | 2015-2016 |
| No of patients | -               | 927       | 2,766     | 4,930     | 4,848     | 5,574     | 6,048     | 5,423     | 819         | 6,710     | 27,614    | 33,290    | 39,674    | 46,578    | 44,834    | 38,905    |
| <b>NRTI</b>    |                 |           |           |           |           |           |           |           |             |           |           |           |           |           |           |           |
| FTC+TDF        | -               | 1.2       | 4.4       | 0.8       | 3.5       | 5.0       | 6.6       | 9.2       | 0.8         | 5.4       | 0.3       | 1.0       | 0.9       | 1.1       | 1.4       | 0.7       |
| 3TC+TDF        | -               | 6.4       | 4.1       | 3.9       | 34.4      | 49.7      | 60.1      | 76.5      | 2.7         | 5.0       | 1.1       | 2.3       | 9.3       | 55.1      | 77.5      | 89.7      |
| 3TC+D4T        | -               | 60.0      | 55.6      | 33.7      | 8.8       | 2.7       | 0.1       | 0.0       | 78.9        | 80.0      | 83.2      | 54.1      | 37.4      | 3.0       | 0.5       | 0.1       |
| 3TC+AZT        | -               | 29.6      | 32.7      | 54.9      | 48.6      | 35.9      | 27.0      | 6.6       | 14.0        | 9.0       | 14.8      | 41.8      | 46.4      | 35.3      | 16.6      | 6.4       |
| 3TC+ABC        | -               | 1.1       | 1.4       | 2.1       | 2.8       | 4.1       | 5.1       | 7.3       | 0.6         | 0.3       | 0.4       | 0.8       | 5.9       | 5.4       | 4.0       | 3.2       |
| Other          | -               | 1.8       | 1.8       | 4.7       | 1.9       | 2.6       | 1.1       | 0.4       | 3.1         | 0.4       | 0.2       | 0.1       | 0.2       | 0.1       | 0.0       | 0.0       |
| <b>NNRTI</b>   |                 |           |           |           |           |           |           |           |             |           |           |           |           |           |           |           |
| NVP            | -               | 64.1      | 65        | 73.6      | 66.6      | 49.2      | 22.5      | 6.3       | 73.1        | 82.6      | 80.9      | 76.4      | 72.2      | 50.4      | 21.3      | 8.1       |
| EFV            | -               | 35.7      | 34.3      | 25.8      | 32.9      | 50.1      | 76.9      | 93.4      | 24.8        | 15.4      | 17.7      | 22.6      | 27.2      | 49.3      | 78.4      | 91.5      |
| Other          | -               | 0.2       | 0.7       | 0.7       | 0.5       | 0.7       | 0.6       | 0.2       | 2.0         | 2.0       | 1.4       | 1.0       | 0.6       | 0.3       | 0.4       | 0.4       |
|                | Southern Africa |           |           |           |           |           |           |           | West Africa |           |           |           |           |           |           |           |
|                | 2001-2002       | 2003-2004 | 2005-2006 | 2007-2008 | 2009-2010 | 2011-2012 | 2013-2014 | 2015-2016 | 2001-2002   | 2003-2004 | 2005-2006 | 2007-2008 | 2009-2010 | 2011-2012 | 2013-2014 | 2015-2016 |
| No of patients | 1,345           | 19,434    | 86,775    | 122,953   | 146,425   | 161,014   | 182,330   | 179,424   | 822         | 3533      | 6,348     | 6,490     | 7,748     | 6,836     | 6,136     | 4,451     |
| <b>NRTI</b>    |                 |           |           |           |           |           |           |           |             |           |           |           |           |           |           |           |
| FTC+TDF        | 2.0             | 0.5       | 0.5       | 17.4      | 24.9      | 34.4      | 62.2      | 51.9      | 0.6         | 0.0       | 0.1       | 1.5       | 11.5      | 17.6      | 11.5      | 11.6      |
| 3TC+TDF        | 2.5             | 1.1       | 1.1       | 2.1       | 17.1      | 33.5      | 22.2      | 40.3      | 0.0         | 0.0       | 0.2       | 0.6       | 3.5       | 10.3      | 32.1      | 55.3      |
| 3TC+D4T        | 37.2            | 47.7      | 55.3      | 49.5      | 36.5      | 15.3      | 3.4       | 0.2       | 39.2        | 46.8      | 51.6      | 42.6      | 21.6      | 4.8       | 0.6       | 0.0       |
| 3TC+AZT        | 47.0            | 39.7      | 27.7      | 16.2      | 10.7      | 8.7       | 6.8       | 2.5       | 35.7        | 39.7      | 43.3      | 51.0      | 46.2      | 53.4      | 49.3      | 22.5      |
| 3TC+ABC        | 0.7             | 0.2       | 0.3       | 1.2       | 5.0       | 6.0       | 4.9       | 5.0       | 0.2         | 0.1       | 0.4       | 0.9       | 0.9       | 4.1       | 5.8       | 10.3      |
| Other          | 10.6            | 10.9      | 15.1      | 13.6      | 5.8       | 2.2       | 0.5       | 0.1       | 24.3        | 13.4      | 4.5       | 3.4       | 16.3      | 9.8       | 0.6       | 0.3       |
| <b>NNRTI</b>   |                 |           |           |           |           |           |           |           |             |           |           |           |           |           |           |           |
| NVP            | 51.1            | 58.1      | 64.8      | 55.4      | 47.2      | 36.7      | 15.6      | 3.7       | 10.1        | 12.0      | 40.9      | 46.1      | 50.2      | 47.0      | 36.1      | 15.0      |
| EFV            | 43.7            | 37.8      | 31.4      | 41.5      | 50.0      | 61.2      | 82.4      | 93.9      | 50.1        | 60.6      | 46.7      | 44.4      | 39.7      | 41.5      | 53.8      | 70.7      |
| Other          | 5.2             | 4.1       | 3.7       | 3.1       | 2.9       | 2.1       | 1.9       | 2.4       | 39.8        | 27.4      | 12.5      | 9.6       | 10.2      | 11.5      | 10.1      | 14.3      |

NRTI, nucleoside reverse transcriptase inhibitor; NNRTI, non-nucleoside reverse transcriptase inhibitor

## Legends to Figures

Figure 1: Map of the 240 active facilities participating in the four African regions of the International epidemiology Databases to Evaluate AIDS (A), together with cumulative numbers of patients starting antiretroviral therapy (B).

Figure 2: Daily number of CD4 cell counts and viral load measurements over time (bar chart) and the number of patients in care (red line).

Figure 3. Trends in mortality (A) and loss to follow (B), 2001 to 2016.

1  
2  
3  
4  
5  
6  
7  
8  
9  
10  
11  
12  
13  
14  
15  
16  
17  
18  
19  
20  
21  
22  
23  
24  
25  
26  
27  
28  
29  
30  
31  
32  
33  
34  
35  
36  
37  
38  
39  
40  
41  
42  
43  
44  
45  
46  
47  
48  
49  
50  
51  
52  
53  
54  
55  
56  
57  
58  
59  
60

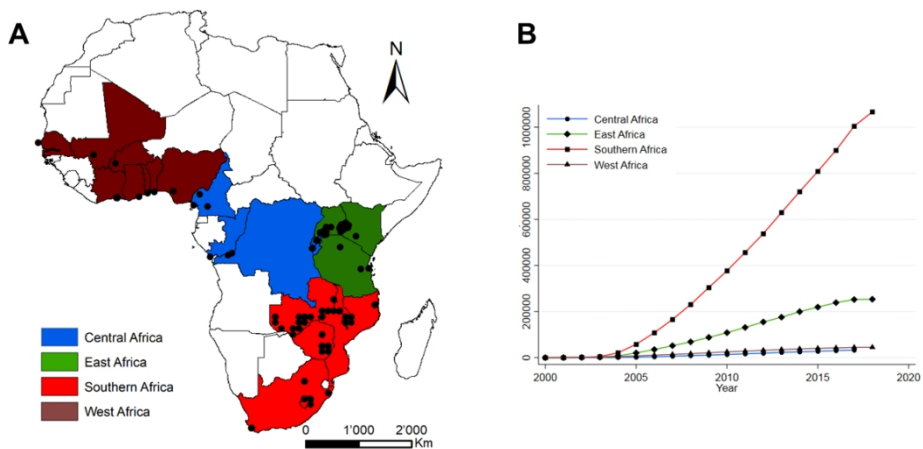

Figure 1: Map of the 240 active facilities participating in the four African regions of the International epidemiology Databases to Evaluate AIDS (A), together with cumulative numbers of patients starting antiretroviral therapy (B).

1  
2  
3  
4  
5  
6  
7  
8  
9  
10  
11  
12  
13  
14  
15  
16  
17  
18  
19  
20  
21  
22  
23  
24  
25  
26  
27  
28  
29  
30  
31  
32  
33  
34  
35  
36  
37  
38  
39  
40  
41  
42  
43  
44  
45  
46  
47  
48  
49  
50  
51  
52  
53  
54  
55  
56  
57  
58  
59  
60



Figure 2. Daily number of CD4 cell counts and viral load measurements over time (bar chart) and the number of patients in care (red line).



Figure 3. Trends in mortality (A) and loss to follow (B), 2001 to 2016.
